# Supplementary material
Source: Royal Society of Chemistry journal article supplement (doi:10.1039/d6dt00902f)
Supplement: d6dt00902f1.pdf [file d6dt00902f1.pdf]

## Supplementary Information

for

# Electrocatalytic Hydrogen Evolution Reaction by an Organometallic Cobalt Complex and its Hybrid Material with MWCNT

Aniruddha Paik<sup>a</sup>, Abhijit Singha<sup>b</sup>, Sabarni Paul<sup>a</sup>, Arijit Maity<sup>c</sup>, Debesh Sharma<sup>d</sup>, Lokesh Rai<sup>a</sup>, Bholanath Maity<sup>\*c</sup> and Sujoy Rana<sup>\*a,b</sup>

<sup>a</sup> Department of Chemistry, University of North Bengal, Darjeeling 734013, India,

<sup>b</sup> School of Chemistry, University of Hyderabad, Hyderabad-500046, India,

Email: [sujoyrana@uohyd.ac.in](mailto:sujoyrana@uohyd.ac.in) , [sujoyran@gmail.com](mailto:sujoyran@gmail.com)

<sup>c</sup> Department of Chemistry, Inorganic Chemistry Section, Jadavpur University, Kolkata 700032, India.

<sup>d</sup> Department of Chemical Sciences, Indian Institute of Science Education and Research Kolkata, Mohanpur-741246, India

<sup>e</sup> KAUST Catalysis Centre (KCC), King Abdullah University of Science and Technology (KAUST), Thuwal 23955-6900, Saudi Arabia, Email: [bholanath.maity@kaust.edu.sa](mailto:bholanath.maity@kaust.edu.sa)

## Table of Contents

| Contents                                                                                                                                                                     | Page No. |
|------------------------------------------------------------------------------------------------------------------------------------------------------------------------------|----------|
| Material and methods; Synthetic procedures                                                                                                                                   | 4-13     |
| <b>Table 1.</b> Performance parameters of <b>1/MWCNT@CP</b> and <b>MWCNT@CP</b> for HER                                                                                      | 11       |
| <b>Table 2.</b> Comparison of the Electrocatalytic HER Activities of Different molecular catalysts heterogenized on different carbon surfaces                                | 11       |
| <b>Fig. S1.</b> <sup>1</sup> H NMR spectrum of BQN ligand in CDCl <sub>3</sub>                                                                                               | 14       |
| <b>Fig. S2.</b> <sup>1</sup> H NMR spectrum of complex <b>1</b> in CDCl <sub>3</sub>                                                                                         | 14       |
| <b>Fig. S3.</b> HRESI-MS of Complex <b>1</b> in MeCN.                                                                                                                        | 15       |
| <b>Fig. S4.</b> UV-vis spectra of Complex <b>1</b> in DMF                                                                                                                    | 16       |
| <b>Fig. S5.</b> Cyclic Voltammogram (CV) of Complex <b>1</b> (1 mM) under Ar atmosphere in DMF at various scan rates. and Plots of peak current vs. square root of scan rate | 16       |
| <b>Fig. S6.</b> Representation for the calculation of overpotential (a) and rate constant ( $k_{obs}$ ) (b) of HER by complex <b>1</b> in DMF                                | 16       |
| <b>Fig. S7.</b> Bulk electrolysis data for complex <b>1</b> in DMF with AcOH as proton source: (a) Charge vs Time plot (b) Current vs Time plot.                             | 17       |
| <b>Fig. S8.</b> Rinse test of complex <b>1</b> in DMF with acetic acid                                                                                                       | 17       |
| <b>Fig. S9.</b> UV-vis spectra of Complex <b>1</b> , before and after bulk electrolysis in DMF with 50 mM AcOH                                                               | 18       |
| <b>Fig. S10</b> SEM image, EDS spectra of graphite plate working electrode before and after electrolysis of complex <b>1</b> in DMF.                                         | 18       |
| <b>Fig. S11</b> UV-vis spectra of Complex <b>1</b> , before and after bulk electrolysis in DMF with 50 mM AcOH                                                               | 19       |
| <b>Fig. S12</b> EPR spectra of (a) Complex <b>1</b> in DMF at 77K (b) 1e- reduced species of <b>1</b> using Co(Cp*) <sub>2</sub> in DMF at 77K                               | 19       |
| <b>Fig. S13</b> EPR of Complex <b>1</b> in DMF (a) with 2 equivalent of Co(Cp*) <sub>2</sub> ; (b) with 2 equivalent of K at 77 K.                                           | 19       |

|                                                                                                                                                                                                             |    |
|-------------------------------------------------------------------------------------------------------------------------------------------------------------------------------------------------------------|----|
| <b>Fig. S14</b> Structures of complex <b>2</b> with the ORTEP diagrams at 50% probability level, solvent and H omitted for clarity; UV-vis spectrum of complex <b>2</b> in DMF.                             | 20 |
| <b>Fig. S15</b> <sup>1</sup> H NMR spectrum of Complex <b>2</b> in CDCl <sub>3</sub>                                                                                                                        | 20 |
| <b>Fig. S16</b> HRESI-MS of Complex <b>2</b> in MeCN.                                                                                                                                                       | 21 |
| <b>Fig. S17.</b> (a) Cyclic voltammogram (CV) and Differential Pulse Voltammetry (DPV) of Complex <b>2</b> in DMF and (b) CV of Complex <b>2</b> in DMF with the sequential addition of AcOH at 0.1 V/s..   | 21 |
| <b>Fig. S18</b> Cyclic Voltammogram (CV) of Complex <b>2</b> (1 mM) under Ar atmosphere in DMF at various scan rates. and Plots of peak current vs. square root of scan rate                                | 22 |
| <b>Fig. S19</b> a) DFT calculated free energy (in kcal/mol) of protonation step on complex <b>1</b> . b) Relative energies of different regioisomer of <sup>3</sup> <b>II</b> .                             | 22 |
| <b>Fig. S20</b> DFT calculated free energy change (in kcal/mol) and reduction potential (in V vs. NHE) of <b>1</b> . Mulliken spin density plots (isosurface = 0.01 au) of open-shell molecules             | 23 |
| <b>Fig. S21</b> Potential energy surface (PES) calculated at the PBE0-D3(SMD-DMF)/def2-TZVP(Co)/def2-SVP(nonmetals) level of theory for the protonation step in the active catalyst <sup>2</sup> <b>A</b> . | 23 |
| <b>Fig. S22</b> Relative energies of different regioisomer of <sup>2</sup> <b>B</b> .                                                                                                                       | 24 |
| <b>Fig. S23</b> Mulliken spin density plots (isosurface = 0.01 au) of open-shell intermediates involved in catalytic cycle.                                                                                 | 24 |
| <b>Fig. S24</b> FE-SEM, TEM, XPS analysis of <b>1/MWCNT@CP</b> hybrid material                                                                                                                              | 25 |
| <b>Fig. S25</b> Double layer capacitance (C <sub>dl</sub> ) determination for <b>1/MWCNT@CP</b>                                                                                                             | 25 |
| <b>Fig. S26</b> Double layer capacitance (C <sub>dl</sub> ) determination for <b>MWCNT@CP</b>                                                                                                               | 26 |
| <b>Fig. S27</b> Nyquist plot of <b>1/MWCNT@CP</b> (black) and <b>MWCNT@CP</b> (red) in 1.0 M aqueous KOH solution                                                                                           | 26 |
| <b>Fig. S28</b> Constant Potential Electrolysis (CPE) recorded at -0.40 V in 1.0 M KOH for 1 hour using <b>1/MWCNT@CP</b> (Black) and <b>MWCNT@CP</b> (red)                                                 | 26 |
| <b>Fig. S29</b> (a) CPE recorded at -0.40 V in 1.0 M KOH for 3 hrs with <b>1/MWCNT@CP</b> ; (b) LSV recorded at 5 mV/s in Ar saturated 1.0 M KOH using <b>1/MWCNT@CP</b> after bulk electrolysis for 3 hrs  | 27 |
| <b>Fig. S30</b> FE-SEM images and elemental mapping through EDX of <b>2/MWCNT@CP</b>                                                                                                                        | 27 |

|                                                                                |       |
|--------------------------------------------------------------------------------|-------|
| after CPE for 3 hrs in 1.0 M KOH;                                              |       |
| <b>Fig. S31</b> XPS analysis of <b>2/MWCNT@CP</b> after 3hr bulk electrolysis. | 27    |
| References                                                                     | 28-29 |
| Cartesian coordinates                                                          | 29-48 |

## Materials and Methods

All the chemicals and reagents have been purchased from commercially available sources (TCI Chemicals, Sigma Aldrich, Spectrochem, BLD Pharm, SRL Chemicals) and used as received without further purification. The solvents were purchased from Finer Chemicals, SRL Chemicals and Qualigens and distilled and dried by standard protocols.  $^1\text{H}$  NMR and  $^{13}\text{C}$  NMR spectra were recorded by using a Bruker Avance 400 MHz spectrometer (Bruker, Massachusetts, USA). All  $^1\text{H}$  NMR spectra are reported in the unit parts per million (ppm) and referenced in the solvent relative to the signals for residual chloroform (7.26 ppm) in  $\text{CDCl}_3$  and DMSO (2.50 ppm) in  $d_6$ -DMSO. The optical absorption spectra were recorded using Shimadzu UV-3600 Plus UV-vis spectrophotometer with 1 cm path length. The elemental (C, H, and N) analysis was performed using the Perkin Elmer 2400 series H CHN analyzer. The High-Resolution mass spectrometry of the complexes was recorded on a Q-ToF Micro YA263 high-resolution (Waters Corporation) mass spectrometer in a positive ion mode. The EPR spectroscopy was performed on a Bruker (X-Band) spectrometer with 9.155 GHz microwave frequency, 100 kHz modulation frequency, 5 mW power, and 4 min of sweep time. The cyclic voltammetry (CV) and linear sweep voltammetry experiments were recorded at room temperature using Metrohm Autolab PGSTAT 204 potentiostat and CHI760E electrochemical Workstation (CH instruments). The headspace gas after bulk electrolysis was analyzed using TCD detector in High-performance gas chromatography (Agilent 8860). GC was calibrated with known volumes of standard  $\text{H}_2$ . Surface analysis studies of the graphite plate working electrode (for homogeneous catalysis) and modified carbon paper electrode (for heterogenous catalysis) using Field Emission Scanning Electron Microscopy (FE-SEM) were done with JEOL JEM 2100 (Tokyo, Japan) scanning electron microscope and ZEISS SUPRA 55-VP JSM equipped with EDAX of GEMINI column technology. Morphology analysis of heterogenous hybrid material (2/MWCNT) was done with JEOL, JEM-2100PLUS (LaB6). The surface chemistry of the modified electrodes (before and after bulk electrolysis) was examined using X-ray photoelectron spectroscopy (XPS, PHI 5000 Versa Probe II, ULVAC-PHI Inc., USA) with micro-focused (100  $\mu\text{m}$ , 15 kV) monochromatic Al-K $\alpha$  X-Ray source ( $h\nu = 1486.6$  eV). A X-ray pass energy of 225 eV was used to examine the survey images. 55 eV pass energy was used to record the key elements high-resolution XPS spectra.

### 1. Electrochemical Study:

All cyclic voltammetry (CV) studies for proton reduction were studied in dry *N,N*-dimethylformamide (DMF) with 0.1 M tetrabutylammonium tetrafluoroborate ( $\text{TBABF}_4$ ) as

supporting electrolyte. The linear sweep voltammetry (LSV) and CVs for heterogeneous hydrogen evolution reaction were performed in 1.0 M aqueous KOH solution. A standard three-electrode system under Ar atmosphere was used with a 3 mm glassy carbon disc as a working electrode, Ag/AgCl as a reference electrode connected by Vycor tip, and platinum wire for the proton reduction studies in DMF. Whereas, a carbon paper working electrode, a Hg/HgO reference electrode and graphite plate as counter electrode has been used for the heterogeneous HER in 1.0 M aqueous solution of KOH. For the heterogeneous HER studies, 1 cm x 1 cm of carbon paper was immersed in the electrolyte solution during the electrochemical measurements. The LSVs for aqueous HER were recorded at a scan rate of 5mV/s. EIS was performed in a frequency range from 1 to 10<sup>5</sup> Hz. All samples were measured twice to ensure reproducibility. All potentials are reported versus NHE (Normal Hydrogen Electrode) for proton reduction and versus RHE (Reversible Hydrogen Electrode) for the aqueous HER. The potentials for aqueous HER were converted to RHE using the Nernst equation,  $E_{RHE} = E^{\ominus}_{Hg/HgO} + E_{Hg/HgO} + 0.059 * pH$ . CV. All the electrochemical data furnished are without iR corrections.

### **Considering theoretical Nernst equation at 25 °C**

$$E_{RHE} = E_{Hg/HgO} + 2.303 (RT/F) * pH + E^{\ominus}_{Hg/HgO}$$

$$E_{RHE} = E_{Hg/HgO} + 0.059 pH + E^{\ominus}_{Hg/HgO}$$

$$E_{RHE} = E_{Hg/HgO} + 0.059 * 14 + 0.098$$

$$E_{RHE} = E_{Hg/HgO} + 0.925$$

Here,  $E^{\ominus}_{Hg/HgO} = 0.098V$  (V vs. NHE, 25 °C) and pH = 14 (1.0 M KOH)

### **Conversion of $E_{Hg/HgO}$ to $E_{RHE}$ considering the practical pH of 1.0 M KOH (13.89 for 1.0 M KOH)**

$$E_{RHE} = E_{Hg/HgO} + 2.303 (RT/F) * pH + E^{\ominus}_{Hg/HgO}$$

$$E_{RHE} = E_{Hg/HgO} + 0.059 pH + E^{\ominus}_{Hg/HgO}$$

$$E_{RHE} = E_{Hg/HgO} + 0.059 * 13.89 + 0.098$$

$$E_{RHE} = E_{Hg/HgO} + 0.9175$$

## **2. Rinse Test**

During rinse test, 25 repetitive CV cycles were recorded within the potential range of catalysis in DMF with 36 mM of acetic acid followed by rinsing the working electrode with DMF and then the rinsed working electrode was used for recording CV in a blank DMF solution. Thereafter, another CV was recorded in DMF with 36 mM of acetic acid.

No redox events were observed in the blank DMF solution by using the rinsed electrode and the slight current increase in presence of acetic acid is negligible with respect to the catalytic current with the complex **1**.

### **3. Experiments for homogeneity test**

Homogeneity of the complex **1** during proton reduction was investigated through rinse test (as described above), UV-vis spectra of complex **1** before and after bulk electrolysis and surface analysis of the graphite plate working electrode before and after bulk electrolysis using SEM-EDS analysis. The rinse test verified that no deposition of heterogeneous materials occurred on the working electrode in during the reaction (Fig S12). Further, the UV-vis spectrum of the complex was found to remain same before and after bulk electrolysis supporting the homogenous nature of the catalyst (Fig. S13). In addition to this, the homogeneity of the catalyst was also checked through scanning electron microscopy (SEM) and energy dispersive X-ray spectroscopy (EDX) analysis of the graphite plate working electrode before and after bulk electrolysis (Fig. S14). The SEM-EDS studies showed no deposition of heterogeneous materials on the working electrode during the bulk electrolysis.

### **4. Electrode preparation for heterogeneous HER**

In a glass vial, 2 mg of Complex **1** and 4 mg of MWCNT was weighed and 100  $\mu\text{L}$  of DMF, 900  $\mu\text{L}$  of ethanol and 25  $\mu\text{L}$  of Nafion binder was added. Then the mixture was sonicated for 30 min to form a homogeneous ink. 400  $\mu\text{L}$  of the ink was drop casted on cleaned carbon paper such that 1 cm x 1 cm surface area was covered by the electrocatalyst and left overnight in oven at 60  $^{\circ}\text{C}$  for drying (mass loading = 2.34  $\text{mg}/\text{cm}^2$ ). This gives the modified electrode **1/MWCNT@CP**. Further, for the modified electrode, **MWCNT@CP** was prepared in similar way only by excluding the complex from the mixture.

### **5. Characterization of 1/MWCNT@CP using SEM and XPS**

The SEM image of **1/MWCNT@CP** shows the presence of porous MWCNT on the carbon paper and the SEM-elemental mapping displayed the presence of Co, N, and O on the electrode surface, thus confirming the uniform heterogenization of the Co complex **1** (Fig S23a-e). Further, the high resolution XPS spectrum of Co  $2p_{3/2}$  in **1/MWCNT@CP** shows the deconvoluted peaks at binding energies of 781.1 eV and 785.8 eV characteristic for  $\text{Co}^{3+}$  along with peak at 783.8 eV and 798.3 eV for  $\text{Co}^{2+}$  in addition to satellite peaks reveals the presence of cobalt on MWCNT <sup>[1]</sup> (Fig. S23h-i).

## 6. Constant Potential Electrolysis (CPE) for homogeneous HER (proton reduction in DMF) and heterogeneous HER (1.0 M KOH)

The bulk electrolysis experiments for proton reduction with the complexes were done in a four-neck glass vessel (77 mL with headspace) where three of the necks were occupied with a graphite plate as the working electrode, a Pt wire as the counter electrode, and Ag/AgCl (in 3M KCl) as the reference electrode. Then the fourth neck was sealed with a rubber septum and was used for purging the solution with Ar before the bulk electrolysis and for the collection of gas from the headspace (using a gas-tight leur-lock Hamilton syringe) post-bulk electrolysis. During the experiments, 12 mL of solution of Complex **1** in DMF (0.5 mM) was added to the vessel, all electrodes along with a magnetic stirbar were inserted with a B-14/20 rubber septum cap (gas tight) and the solution was purged with Ar for 15 minutes. After purging, a chronocoulometric experiment was started at the catalytic potential along with constant stirring throughout the experiment. After the completion of the reaction the headspace gas was collected and analysed using Gas Chromatography instrument containing a TCD detector. The GC was calibrated with standard gas mixtures containing 10% H<sub>2</sub>, CO and N<sub>2</sub>.

The CPE for heterogeneous HER with hybrid material in 1.0M KOH was carried out using a sealed two-chambered H-cell setup. One chamber accommodates the working and reference electrodes in 10 mL electrolyte solution, while the other chamber contains the counter electrode in 10 mL electrolyte solution. The chambers were separated by a Nafion membrane. The headspace in the working electrode portion was 28 mL. Before bulk electrolysis the electrolyte solutions in both the chambers were purged thoroughly with Ar for 10 min. The CPE was carried out at potential corresponding to -10 mA/cm<sup>2</sup> for the HER. Thereafter, after 1hr, the headspace gas of the working electrode was introduced in GC instrument (using a gas-tight leur-lock Hamilton syringe) for detection and quantification of hydrogen.

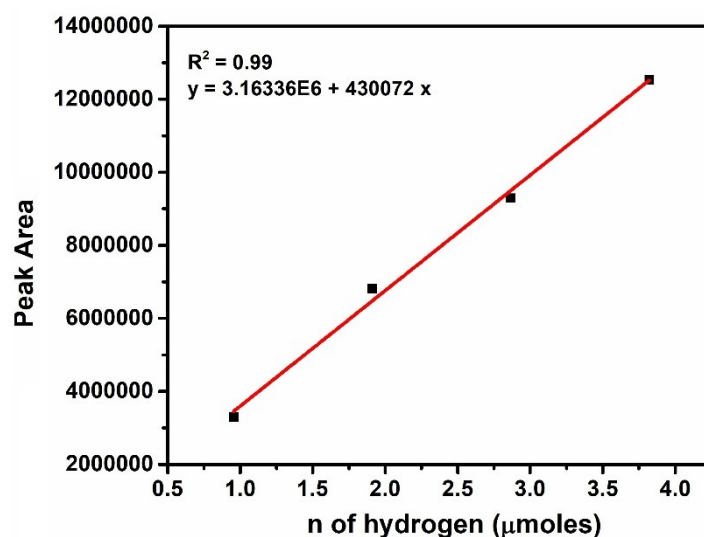

## Calibration curve of the standard gas mixture for the determination of hydrogen

### 7. Post electrolysis characterization of 1/MWCNT@CP using XPS.

The XPS survey scan of the post electrolysis electrode showed the presence of Co 2p, C 1s and O 1s (Figure S30a). The Co 2p<sub>3/2</sub> and Co 2p<sub>1/2</sub> peaks in the high resolution XPS spectrum of Co 2p were deconvoluted into Co<sup>3+</sup> and Co<sup>2+</sup> peaks along with the satellite peaks. The peaks at 779.6 eV and 795.2 eV binding energies corresponding to Co<sup>3+</sup> indicates the formation of CoOOH <sup>1</sup>. On the other hand the Co<sup>2+</sup> peaks at the binding energies 781.4 eV and 796.7 eV can be assigned to Co(OH)<sub>2</sub> <sup>2</sup> formed during the bulk electrolysis. (Figure S30b).

### 8. Computational methods

The Gaussian 16 software<sup>[4]</sup> was used for geometry optimizations of all stationary states and transition states employing the exchange and correlation functional of Perdew, Burke and Ernzerhof, (PBE) called PBE0 which includes Hartree-Fock (HF) exchange in a 3:1 ratio of PBE to HF, in addition with including the Grimme empirical dispersion correction D3 (PBE0-D3).<sup>[5]-[6]</sup> To simulate the effect of the solvent, the universal solvation model that is based on the full solute electron density (SMD) implicit solvation model was used.<sup>[7]</sup> For basis sets, we employed the split-valence plus single polarization def2-SVP for lighter atoms (H, C, N, and O), triple- $\zeta$  def2-TZVP for Co.<sup>[8]</sup> For further validation of energies, single point calculations using the SMD solvation model were performed with the hybrid-meta-GGA M06 functional<sup>[9]</sup> with the def2-TZVPP<sup>5</sup> for all the atoms. Unless specified otherwise, free energy values,  $\Delta G$ , combining single point energy ( $\Delta E$ ) at M06(SMD-DMF)/def2-TZVPP with the thermal correction ( $\Delta G$ -corr) at PBE0-D3(SMD-DMF)/def2-TZVP(Co)/def2-SVP(non-metals) are reported throughout the manuscript and supporting information.

### 9. Calculations

#### 9.1. Calculation of rate of catalysis ( $k_{obs}$ )

The rates ( $k_{obs}$ ) of proton reduction by complex **1** and **2** were determined at saturated acid concentration of acetic acid (36 mM for **1** and 12 mM for **2**) using equation 1

$$\frac{ic}{ip} = \frac{n \sqrt{RTk_{obs}}}{0.4463 Fv} \dots\dots\dots(1)$$

Where,  $i_c$  is the catalytic peak current at saturation point of acid, and  $i_p$  is the stoichiometric current without the acetic acid,  $n$  is the number of electrons transferred during catalysis,  $F$  is 1 Faraday,  $R$  is the universal gas constant,  $T$  is the temperature,  $v$  is the scan rate in V/s.<sup>[10]</sup>

### 9.2. Calculation of Faradaic efficiency for complex 1 in DMF with AcOH

The overall charge passed during the catalysis = 6.001 C

Amount of H<sub>2</sub> expected = 6.001/(96485 x 2) = 0.0311 mmol

Amount of H<sub>2</sub> detected in GC after the bulk electrolysis = 0.0297 mmol

Faradaic efficiency of 2 in DMF with AcOH = (0.0297/0.0311) x 100 % = 95.4 %

### 9.3. Mass loading for the 1/MWCNT@CP

1025  $\mu$ L of homogeneous mixture ink contains = 6 mg of electrocatalyst mixture

1  $\mu$ L homogeneous mixture ink contains = (6/1025) mg of electrocatalyst mixture

400  $\mu$ L homogenous mixture ink contains = (6/1025) x 400 mg of electrocatalyst mixture

= 2.34 mg of electrocatalyst mixture

Mass loading = (mass of electrocatalyst mixture taken)/(Surface area of the working electrode)

= 2.34 mg/ 1 cm<sup>2</sup>

= 2.34 mg/cm<sup>2</sup>

Here, the surface area of the working electrode is 1 cm<sup>2</sup>.

### 9.4. Calculation of Overpotential for heterogenous catalysis in 1.0 M aqueous KOH

The potential corresponding to 10 mA/cm<sup>2</sup> current density in the LSV curves denotes the overpotential for the heterogenous material. Notably, this current density is the key benchmark of solar driven electrolyzer, reflecting the performance of water splitting devices attaining 10% solar-to-fuel efficiency at “1 Sun” illumination (AM 1.5, 100 mW cm<sup>-2</sup>).<sup>[11]</sup> The calculations are performed by using the thermodynamic HER potential ( $E^0_{\text{H}_2\text{O}/\text{H}_2} = 0$  V) as the reference.

### 9.5. Tafel Slope

The Tafel slope was determined from the LSV curve using the Tafel equation (equation 2) where the Tafel slope was calculated by fitting the overpotential ( $\eta$ ) vs log ( $j$ ) using the equation:

$\eta = b \log j + a$ .....Equation 2

where,  $b$  and  $j$  represent the Tafel slope and current density, respectively.

### 9.6. Electrochemical double-layer capacitance ( $C_{dl}$ )

The electrochemical double-layer capacitance was calculated by recording the CV at different scan rates in the non-faradaic region within the potential window 0.78 V to 0.96 V (vs RHE) in Ar saturated 1.0 M aqueous KOH, followed by plotting the graph between scan rate and current at the mid-point of the potential window. Thereafter, the linear fitting of the curve was done to obtain the slope that gives the double layer capacitance. This non-faradaic region is typically 0.18 V window about the open circuit potential, and all the measured current values are due to double layer charging.

The double-layer capacitance ( $C_{dl}$ ) was calculated using the equation given below

$$i_c = v C_{dl}$$

where,  $i_c$  = Double-layer charging current,  $v$  = Scan rate

### 9.7. Electrochemical active surface area (ESCA)

Electrochemically active surface area (ESCA) was calculated from the double layer capacitance ( $C_{dl}$ ).<sup>[12]</sup> It is calculated using the following equation given below

$$ESCA = C_{dl}/C_s$$

Where,  $C_{dl}$  = Double Layer capacitance,  $C_s$  = specific capacitance of the system (constant factor). Generally, the  $C_s$  value is 0.02-0.06 mF/cm<sup>2</sup> for a flat electrode surface of 1 cm<sup>2</sup>. Here we have considered 0.04 mF/cm<sup>2</sup> as the specific capacitance ( $C_s$ ).<sup>[13]</sup>

The ESCA values for the **1/MWCNT@CP** and **MWCNT@CP** have been presented below in **Table 1**.

### 9.8. Roughness Factor ( $R_f$ )

The roughness factor for the **1/MWCNT@CP** and **MWCNT@CP** is calculated by the following equation:

$$R_f = (ESCA / \text{Electrode geometric area})$$

The geometric area taken for the work is 1 cm<sup>2</sup>.

The obtained  $R_f$  factor are below in the **Table 1**.

### 9.9. Calculation of Faradaic efficiency for complex 1/MWCNT@CP in 1.0 M aqueous KOH

The overall charge passed during the catalysis = 35.34 C

Amount of H<sub>2</sub> expected = 35.34/(96485 x 2) = 0.183 mmol

Amount of H<sub>2</sub> detected in GC after the bulk electrolysis = 0.1095 mmol

Faradaic efficiency of 1/MWCNT@CP = (0.1095/0.183) x 100 % = 60 %

**Table 1.** Performance parameters of 1/MWCNT@CP and MWCNT@CP for HER

| Material<br>Parameters                                     | 1/MWCNT@CP               | MWCNT@CP                 |
|------------------------------------------------------------|--------------------------|--------------------------|
| Overpotential (mV) at 10mA/cm <sup>2</sup> current density | 401 mV                   | 654 mv                   |
| Tafel slope                                                | 175 mV dec <sup>-1</sup> | 190 mV dec <sup>-1</sup> |
| Double layer capacitance (C <sub>dl</sub> )                | 5.21 mF                  | 4.69 mF                  |
| Electrochemical surface area (ECSA)                        | 130 cm <sup>2</sup>      | 117 cm <sup>2</sup>      |
| Roughness factor (R <sub>f</sub> )                         | 130                      | 117                      |

**Table 2.** Comparison of the Electrocatalytic HER Activities of Different molecular catalysts heterogenized on different carbon surfaces

| Sl. No. | Catalyst                         | Conditions                                      | HER Overpotential (mV) | Tafel slope (mV dec <sup>-1</sup> ) | Ref       |
|---------|----------------------------------|-------------------------------------------------|------------------------|-------------------------------------|-----------|
| 1       | CoTBImpc-CNT/GCE                 | 0.5 M H <sub>2</sub> SO <sub>4</sub> (pH = 0.3) | 63                     | 43.2                                | 14        |
| 2       | GDL/MWCNT/Co-material            | Acetate buffer solution                         | 590                    | 160                                 | 15        |
| 3       | CuL/GO                           | 0.5 M NaCl                                      | 167                    | -                                   | 16        |
| 4       | Pyrene substituted CoTMPA /SWCNH | 1M phosphate buffer (pH 7.4)                    | 540                    | 160                                 | 17        |
| 5       | rGO/2-Cox                        | 0.5 M H <sub>2</sub> SO <sub>4</sub>            | 340                    | 111                                 | 18        |
| 6       | CNT-f-FeP <sup>F</sup>           | 0.1 M H <sub>2</sub> SO <sub>4</sub>            | 457                    | 68                                  | 19        |
| 7       | 1/MWCNT@CP                       | 0.1 M KOH                                       | 401                    | 175                                 | This Work |

## 10. Synthetic procedure

The ligand 2-methyl-*N*-(quinolin-8-yl)benzamide (BQN), the organometallic cobalt complex [Co(BQNN)(BQN)(H<sub>2</sub>O)](1), and the cobalt complex [Co(BQN)<sub>2</sub>](2) were synthesized following the previously reported methods. [20], [21]

### 10.1. Synthesis of [Co<sup>III</sup>(BQNN)(BQN)(H<sub>2</sub>O)] (1)

The ligand BQN (1000 mg, 3.81 mmol), sodium pivalate (946 mg, 7.62 mmol), potassium persulfate (K<sub>2</sub>S<sub>2</sub>O<sub>8</sub>) (2060 mg, 7.62 mmol) and Co(OAc)<sub>2</sub>·4H<sub>2</sub>O (946 mg, 3.80 mmol) were taken in a round bottom flask and then trifluoroethanol (TFE) (15 mL) was added to the mixture. The resulting deep pink solution was heated at 70 °C for 24 hours to give a deep brown solution. Thereafter, the solvent was removed under vacuum and to the resulting mixture DCM was added and then it was passed through small silica plug. Further, the silica plug was washed with ethyl acetate. Then the resulting solution was purified through column chromatography with silica gel (60-100 mesh size) as the stationary phase using hexane-ethyl acetate mixture as eluent. The complex was isolated as yellowish brown solid that was recrystallized as dark brown crystals by layering hexane over a concentrated solution of complex in DCM.

Yield: 15%; <sup>1</sup>HNMR (400 MHz, CDCl<sub>3</sub>): 9.54 (2H), 9.30 (1H), 8.35 (1H), 8.23 (1H), 8.01 (1H), 7.80 (1H), 7.68-7.61 (4H), 7.48-7.43 (5H), 7.08-7.06 (3H), 2.85 (3H), 2.66 (3H); UV-vis (DMF; λ<sub>max</sub> (ε/M<sup>-1</sup> cm<sup>-1</sup>)): 412 nm (ε~ 8063 M<sup>-1</sup> cm<sup>-1</sup>)

HRESI-MS (MeCN): Calculated (m/z) for [C<sub>34</sub>H<sub>25</sub>CoN<sub>4</sub>O<sub>2</sub> + H<sup>+</sup>] = 581.1388 , Found: 581.1381 ([Co(BQNN)(BQN)] + H<sup>+</sup>)

### 10.2. Synthesis of [Co<sup>II</sup>(BQN)<sub>2</sub>] (2)

The ligand BQN (267.3 mg, 1.02 mmol), sodium hydride (49 mg, 1.10 mmol) and stir-bar were taken in a 50 mL Schlenk RB under inert atmosphere and to this mixture 10 mL of dry dimethylformamide was added with a syringe. The resulting mixture was stirred for 1 hour under inert atmosphere resulting in a deep yellow solution. Thereafter, to this solution, solid CoBr<sub>2</sub> (111.5 mg, 0.51 mmol) was added resulting an immediate colour change to deep burgundy colour. Then the homogeneous solution was dried under reduced pressure to give a dark maroon coloured solid. Thereafter, the solid was extracted in DCM and was passed through a Celite ® plug. This obtained solution was layered with petroleum ether to yield dark red coloured crystals of the complex.

Yield: 85%;  $^1\text{H}$  NMR ( $\text{CDCl}_3$ , 400 MHz): -20.89, -19.70, -9.36, -8.03, 26.22, 39.74, 42.48, 45.66, 65.59; UV-vis (DMF;  $\lambda_{\text{max}}$  ( $\epsilon/\text{M}^{-1} \text{cm}^{-1}$ )): 387 nm (2801  $\text{M}^{-1} \text{cm}^{-1}$ ); HRESI-MS (MeCN): Calculated (m/z) for  $\text{C}_{34}\text{H}_{26}\text{CoN}_4\text{O}_2$  : 581.1388 [Co(BQN)(BQN)], Found: 581.1387.

## Supporting Figures:

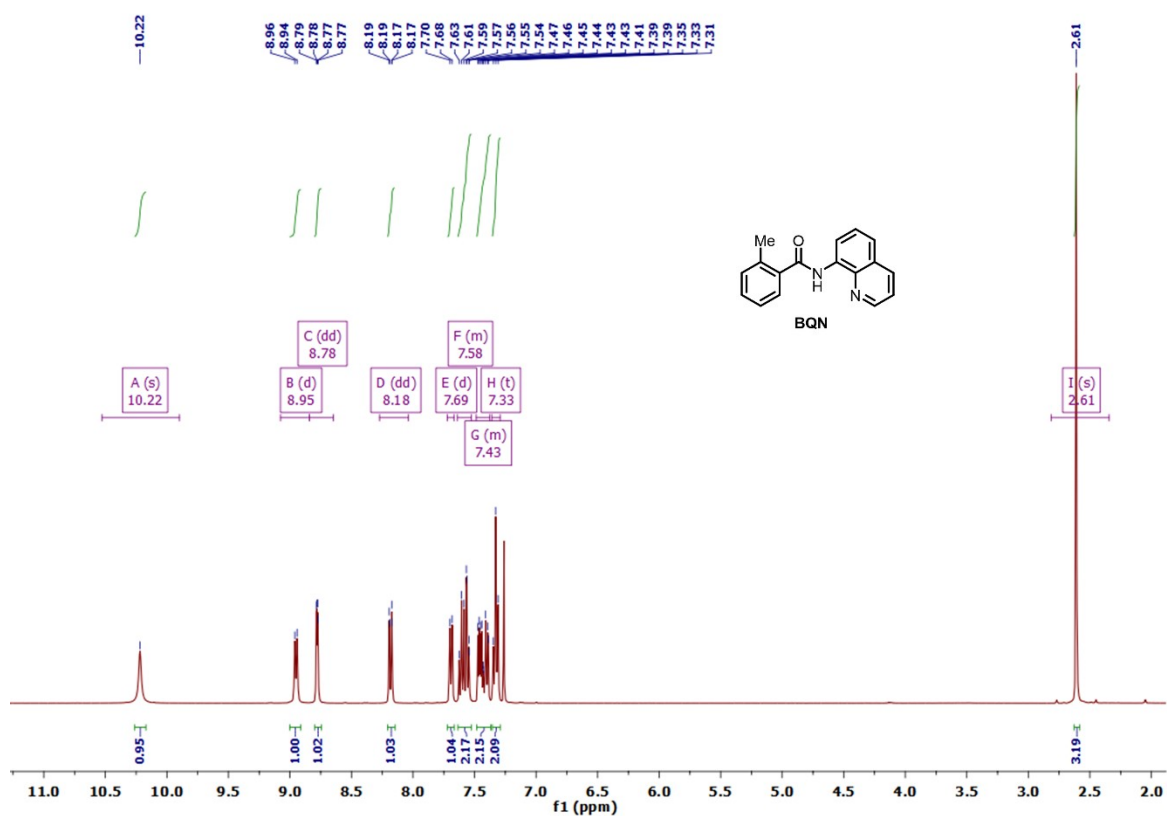

Fig

. S1.  $^1\text{H}$  NMR spectrum of BQN ligand in  $\text{CDCl}_3$

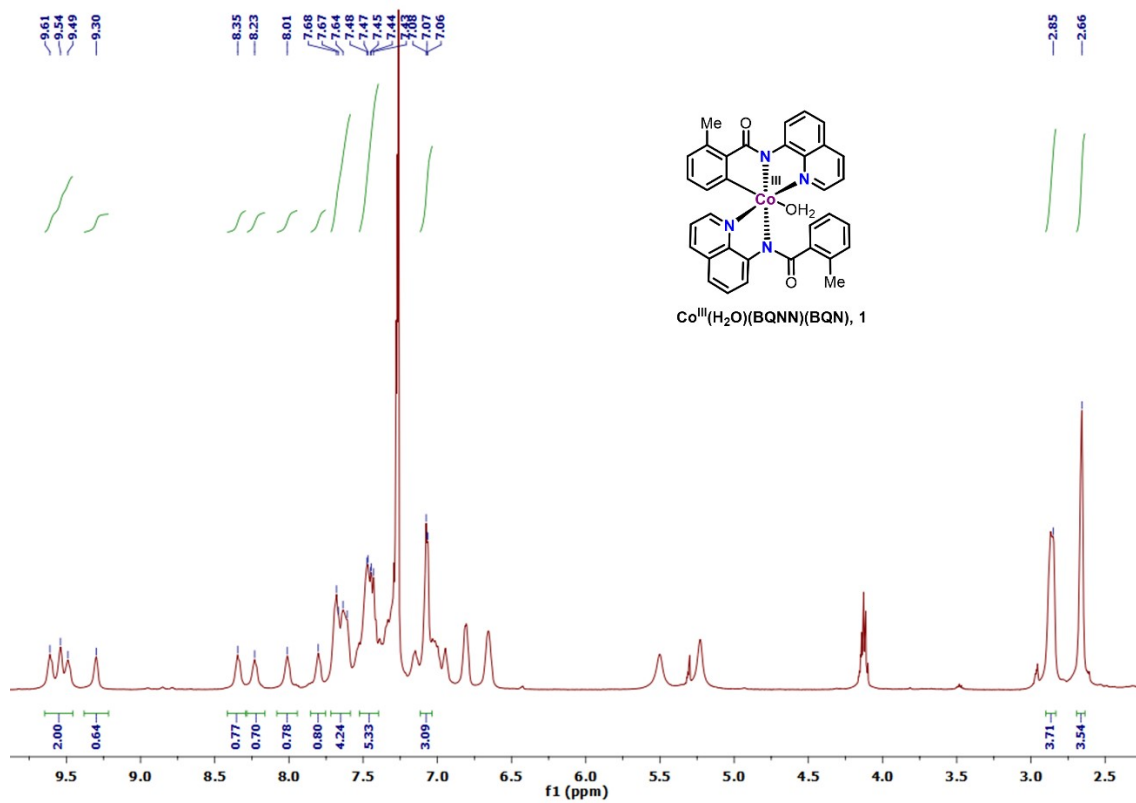

Fig. S2.  $^1\text{H}$  NMR spectrum of Complex 1 in  $\text{CDCl}_3$

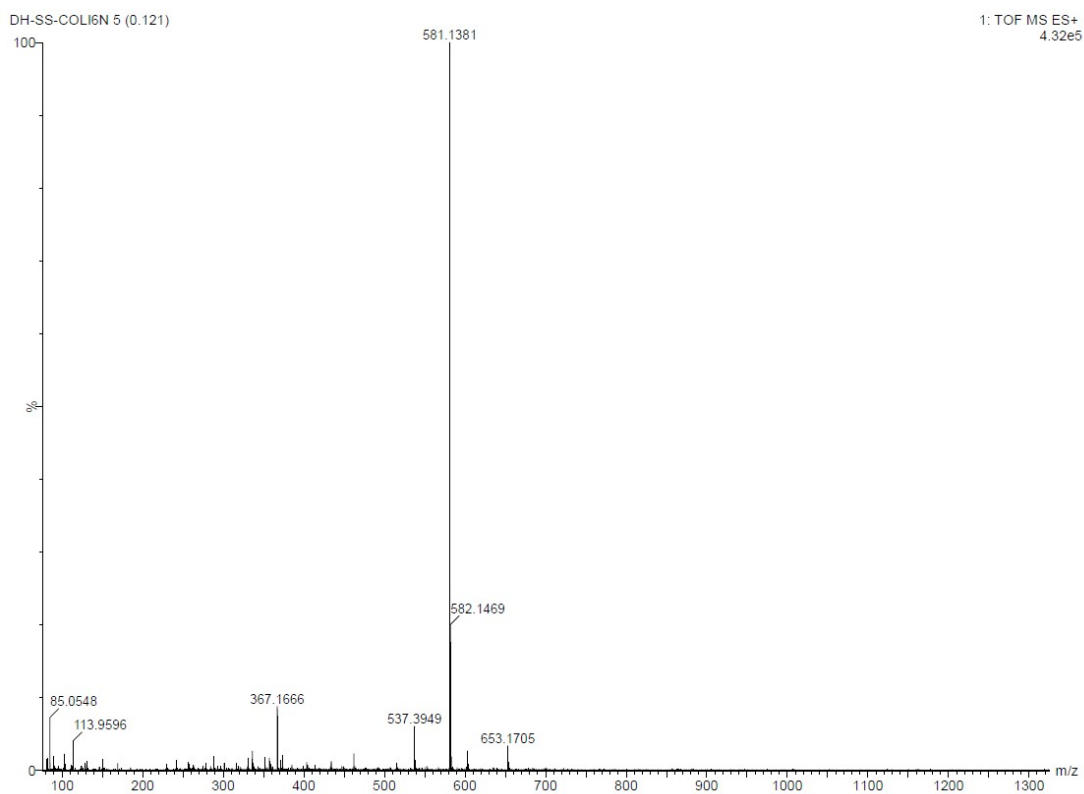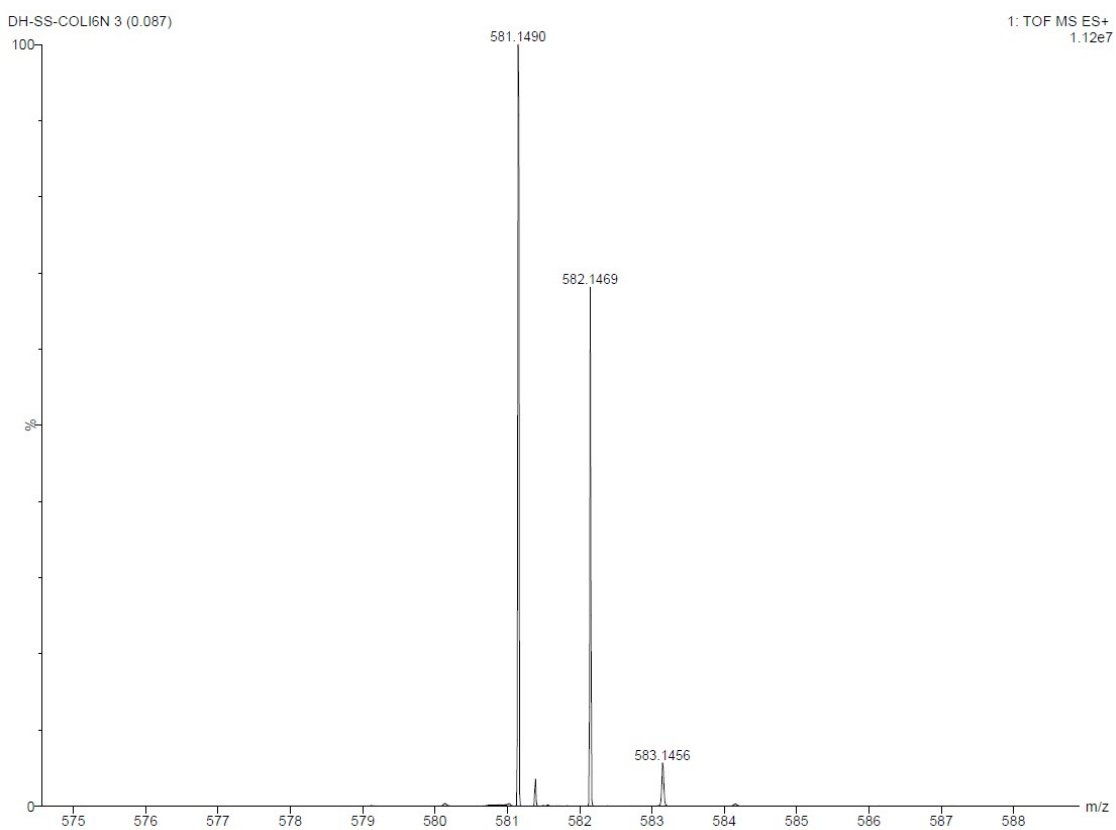

**Fig. S3.** HRESI-MS of Complex **1** in MeCN (Top). Calculated (m/z) for  $[C_{34}H_{25}CoN_4O_2 + H^+] = 581.1388$  , Found: 581.1381 ( $[Co(BQNN)(BQN)] + H^+$ ). Isotopic distribution of m/z value of ( $[Co(BQNN)(BQN)] + H^+$ ) (Bottom)

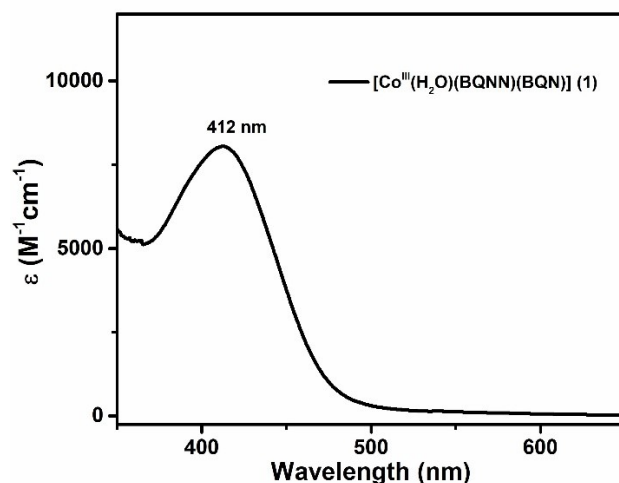

**Fig. S4** UV-vis spectra of Complex **1** in DMF

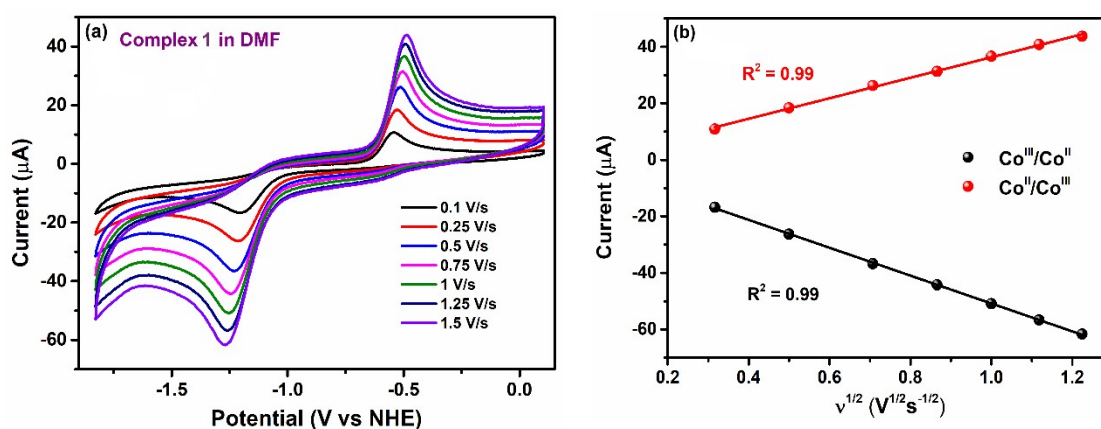

**Fig. S5.** (a) Cyclic Voltammogram (CV) of Complex **1** (1 mM) under Ar atmosphere in DMF at various scan rates. (b) Plots of peak current vs. square root of scan rate for the  $\text{Co}^{\text{II}}/\text{Co}^{\text{I}}$  reduction peak (black) and  $\text{Co}^{\text{I}}/\text{Co}^{\text{II}}$  oxidation event. Linear variation of the peak currents (anodic and cathodic peak) of  $\text{Co}^{\text{II}}/\text{Co}^{\text{I}}$  redox event with the square root of scan rate validate the diffusion controlled redox events showing a diffusion coefficient of  $D = 9.011 \times 10^{-7} \text{ cm}^2/\text{s}$  in DMF.

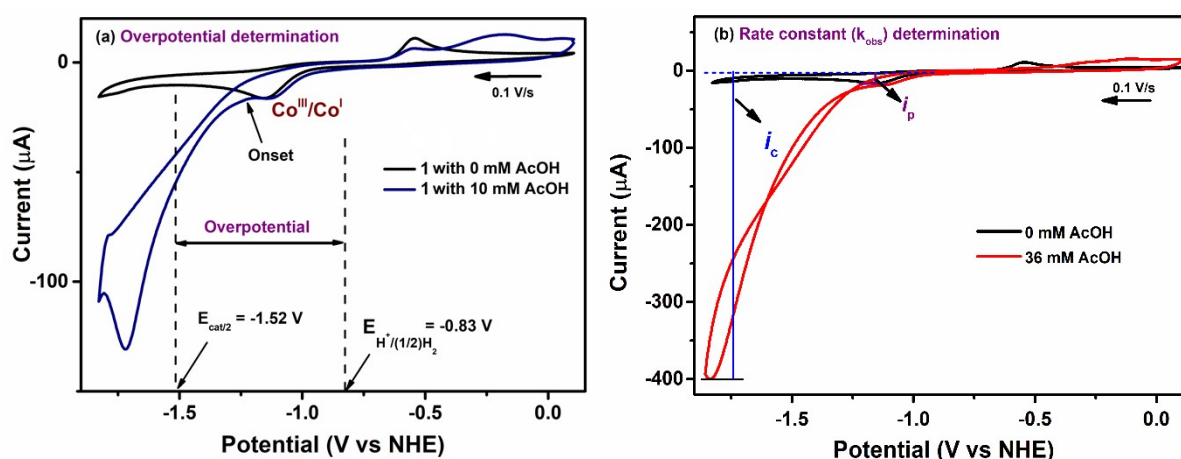

**Fig. S6** (a) Representation for the calculation of overpotential of HER by complex **1** in DMF. (b) representation of  $i_c$  and  $i_p$  for complex **1** at saturated acid condition for the calculation of the rate constant ( $k_{\text{obs}}$ ) of proton reduction

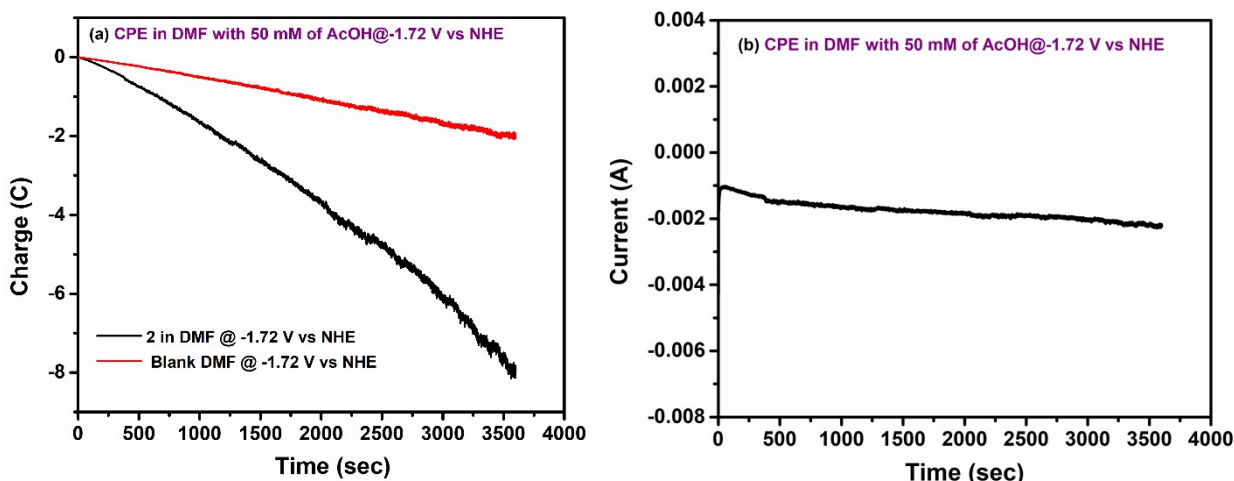

**Fig. S7** (a) Charge vs Time plot and (b) Current vs Time plot during bulk electrolysis using complex **1** (0.5 mM) in dimethylformamide with 50 mM of AcOH and 0.1 M TBABF<sub>4</sub> as the supporting electrolyte at an applied potential of -1.7 V vs NHE using Graphite plate as working electrode, Ag/AgCl (3.0 M KCl) as reference electrode and platinum mesh as counter electrode.

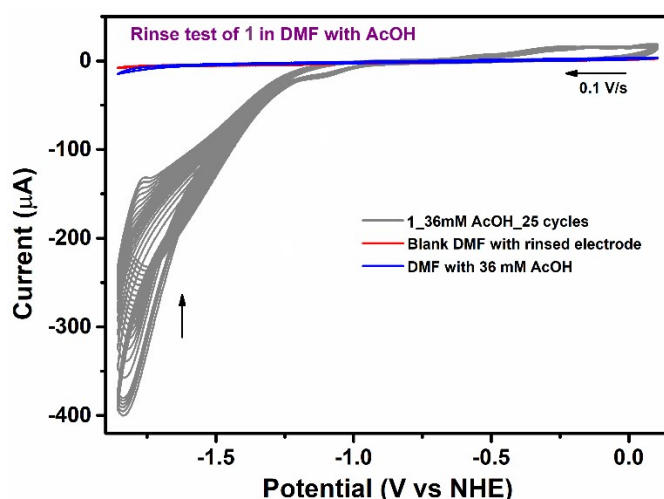

**Fig. S8** Rinse Test for complex **1** (1 mM) in DMF at 0.1 V/s: Initially, 25 continuous CV cycles was recorded in DMF in presence of 36 mM AcOH with cathodic scan from 0.1 V to -1.85 V then a returning anodic scan to 0.1 V/s (0.1 M TBABF<sub>4</sub> as supporting electrolyte). Then the working electrode was washed with deionised water followed by DMF without polishing. Thereafter, the washed electrode was used for recording the CV within the same potential window in fresh DMF solution (containing only 0.1M TBABF<sub>4</sub> as the supporting electrolyte) which showed no catalytic current. Further, another CV was recorded after adding 36 mM AcOH in the same blank DMF solution which shows no current increment. This reveals that no active film is generated during the 25 cycles, suggesting the homogeneous nature of the catalyst **1** in DMF.

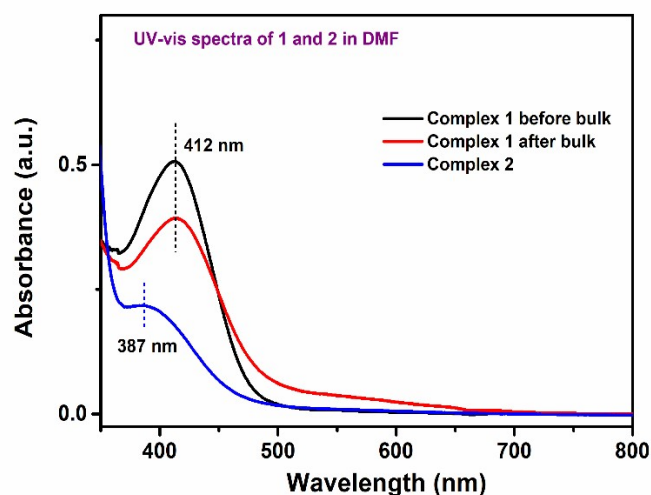

**Fig. S9** UV-vis spectra of Complex 1, before and after bulk electrolysis in DMF with 50 mM AcOH at -1.7 V vs NHE along with the UV-vis spectra of Co(II) complex 2 for comparison.

Before CPE with Complex 1

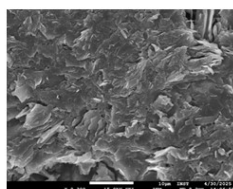

A) FE-SEM

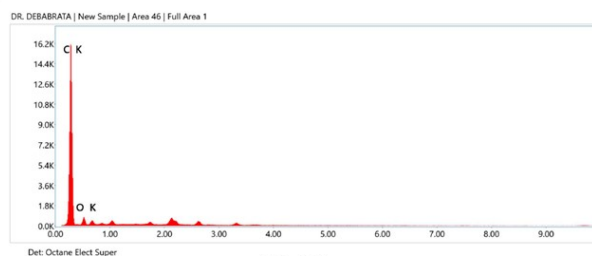

B) EDS

eZAF Quant Result - Analysis Uncertainty 99.33 %

| Element | Weight % | Atomic % |
|---------|----------|----------|
| C K     | 93.5     | 95.1     |
| O K     | 6.5      | 4.9      |
| Co K    | 0.0      | 0.0      |

C) EDS-Analysis

After CPE with Complex 1

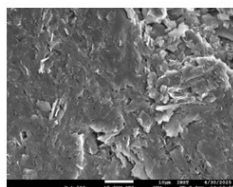

D) FE-SEM

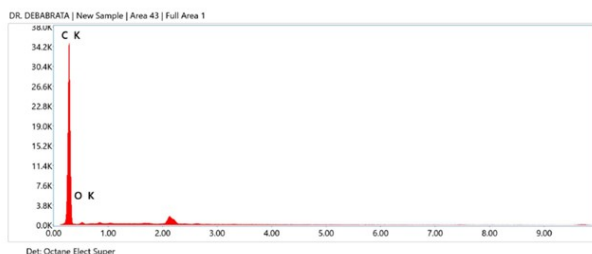

E) EDS

eZAF Quant Result - Analysis Uncertainty 99.00 %

| Element | Weight % | Atomic % |
|---------|----------|----------|
| C K     | 98.4     | 98.7     |
| O K     | 1.6      | 1.2      |
| Co K    | 0.0      | 0.0      |

F) EDS-Analysis

**Fig. S10** (a) SEM image, EDS spectra of graphite plate working electrode before and after electrolysis of complex 1 in DMF. The working electrode was rinsed with DMF only after bulk electrolysis and analysed by SEM and EDS experiment. No cobalt deposit was found on working electrode.

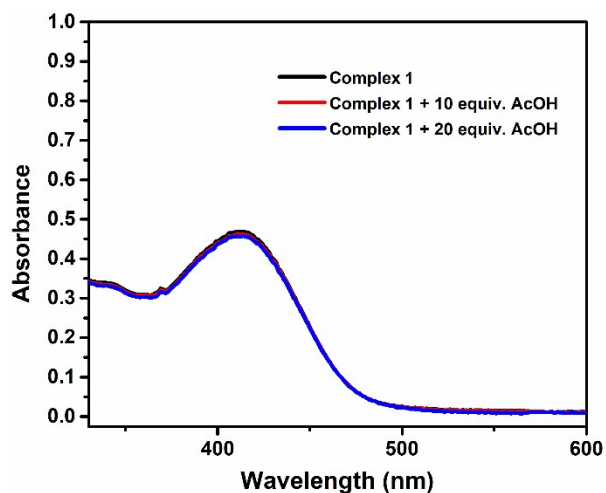

Fig. S11. UV-vis spectra of complex 1 in DMF in presence of different amount of acetic acid (AcOH).

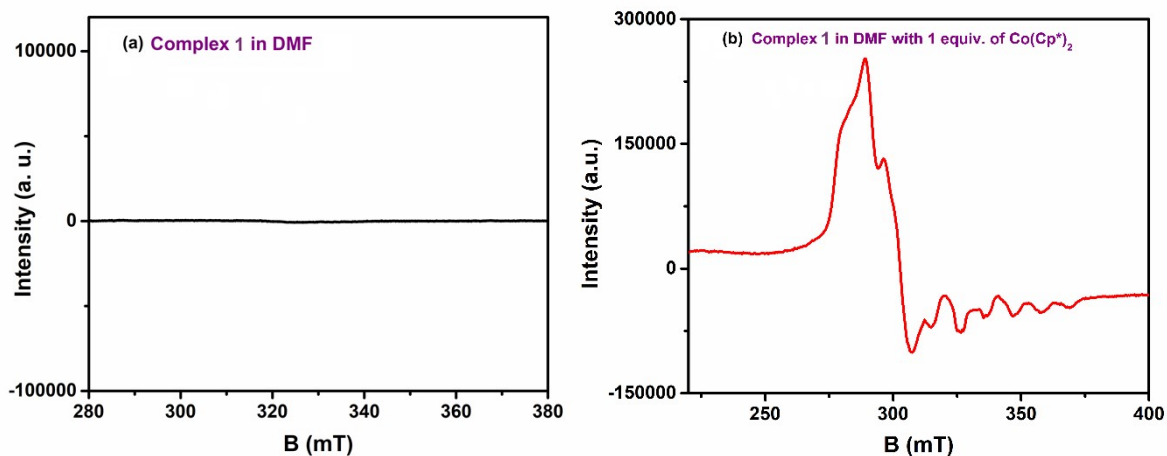

Fig. S12 EPR spectra of (a) Complex 1 in DMF at 77K (b)  $1e^-$  reduced species of 1 using  $\text{Co}(\text{Cp}^*)_2$  in DMF at 77K.

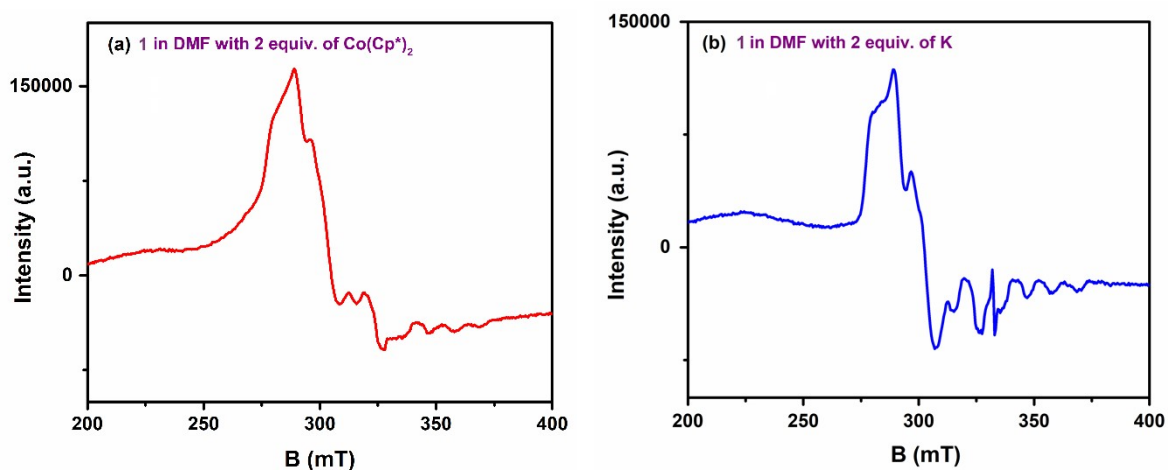

Fig. S13 EPR of Complex 1 in DMF (a) with 2 equivalent of  $\text{Co}(\text{Cp}^*)_2$ ; (b) with 2 equivalent of K at 77 K.

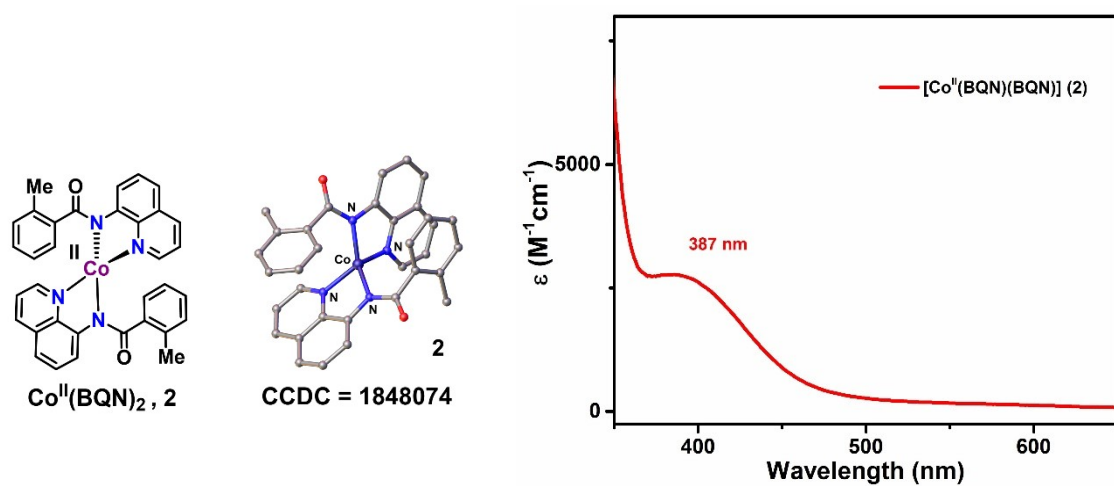

**Fig. S14.** Structures of complex **2** with the ORTEP diagrams at 50% probability level, solvent and H omitted for clarity; UV-vis spectrum of complex **2** in DMF.

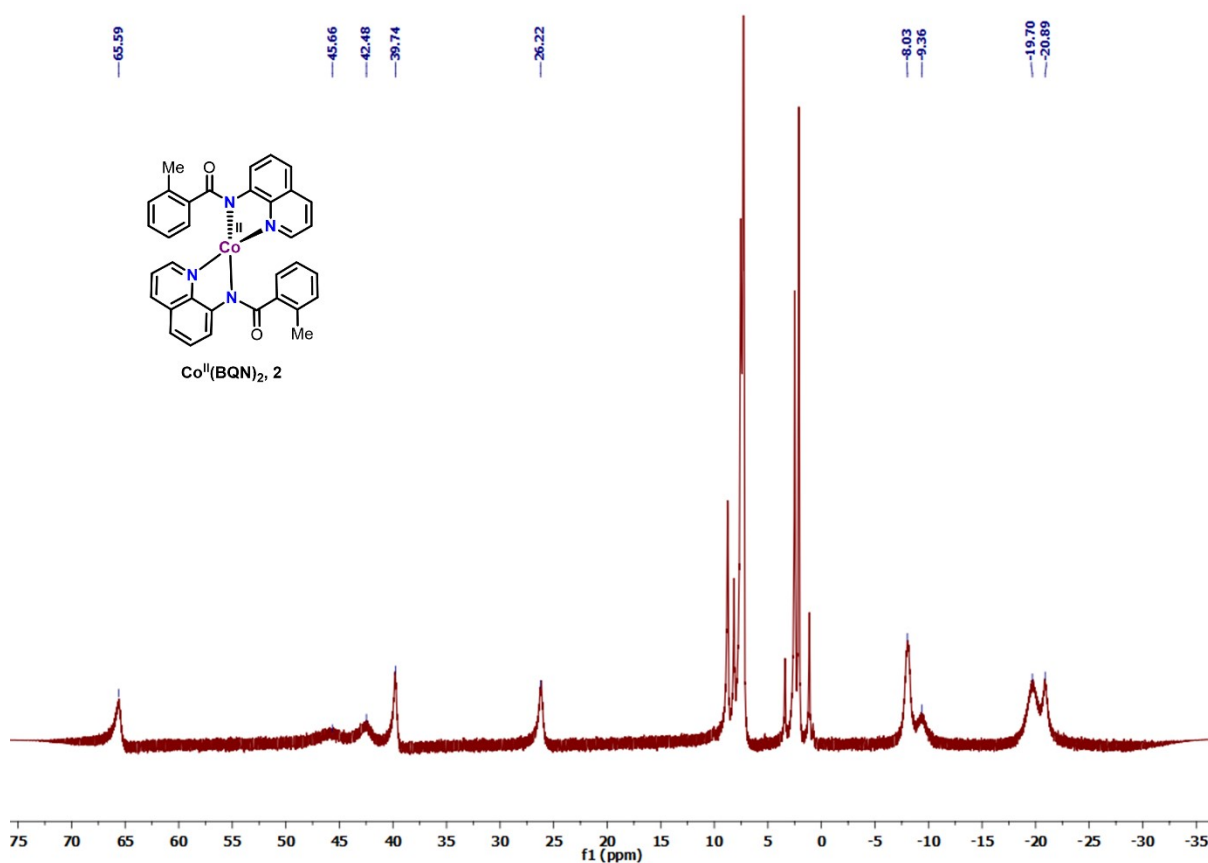

**Fig. S15.**  $^1\text{H}$  NMR spectrum of Complex **2** in  $\text{CDCl}_3$

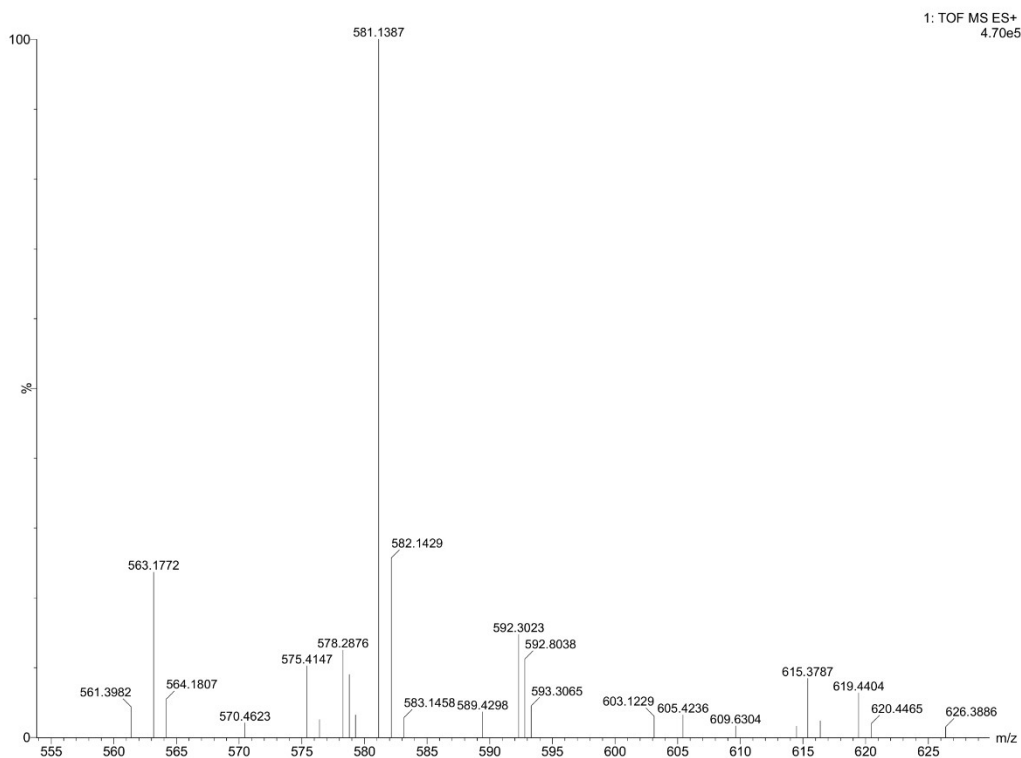

**Fig. S16.** HRESI-MS of Complex **2** in MeCN.  $m/z = 581.1387$  for  $[\text{Co}(\text{BQN})_2]^+$

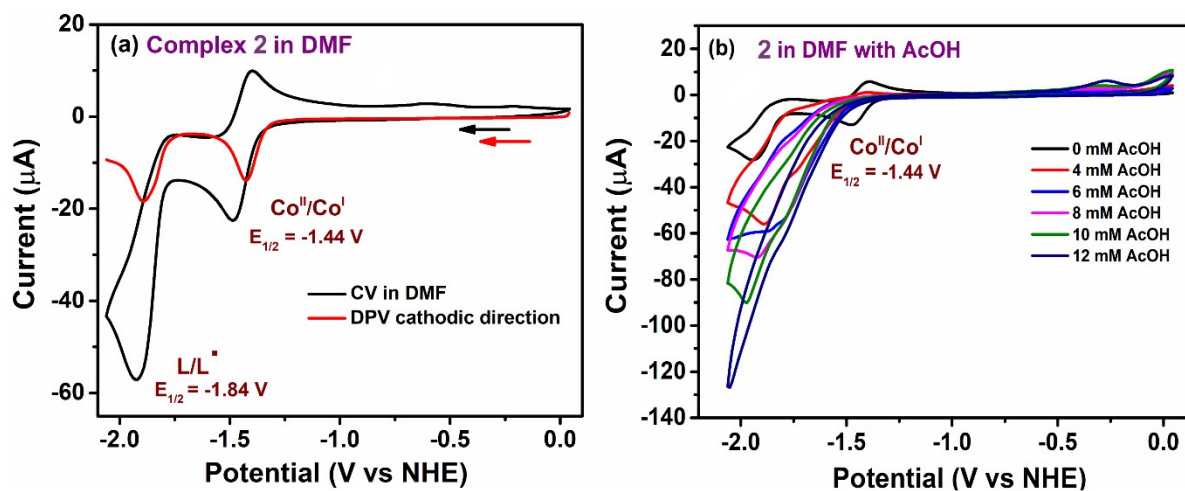

**Fig. S17** (a) Cyclic voltammogram (CV) and Differential Pulse Voltammetry (DPV) of Complex **2** in DMF and (b) CV of Complex **2** in DMF with the sequential addition of AcOH at 0.1 V/s.

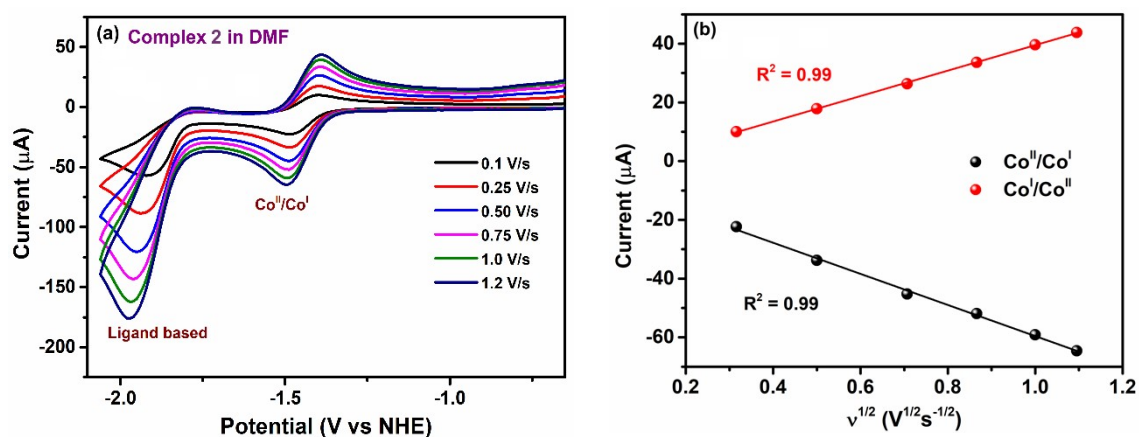

**Fig. S18.** (a) CV of Complex **2** (1 mM) under Ar atmosphere in DMF at various scan rates. (b) Plots of peak current vs. square root of scan rate for the  $\text{Co}^{\text{II}}/\text{Co}^{\text{I}}$  reduction peak (black) and  $\text{Co}^{\text{I}}/\text{Co}^{\text{II}}$  oxidation event. The linear variation of the cathodic and anodic peak currents with the square root of scan rate during the scan rate variation CVs of the complex confirms the diffusion-controlled behaviour of the redox processes.

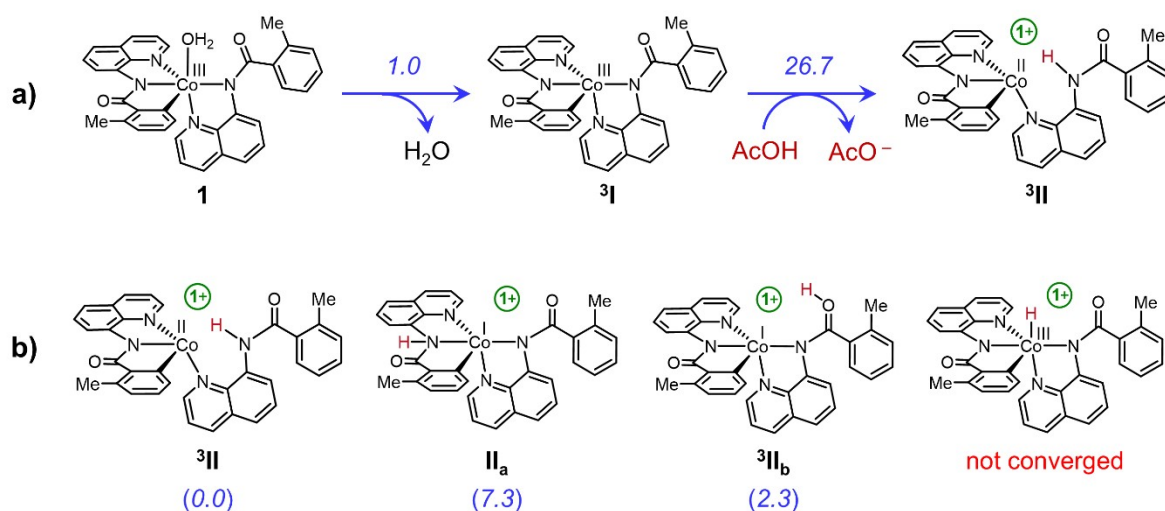

**Fig. S19** a) DFT calculated free energy (in kcal/mol) of protonation step on complex **1**. b) Relative energies of different regioisomer of  $3^{\text{II}}$ . Free energy values are at the M06(SMD-DMF)/def2-TZVPP//PBE0-D3(SMD-DMF)/def2-TZVP(Co)/def2-SVP(non-metals) level of theory.

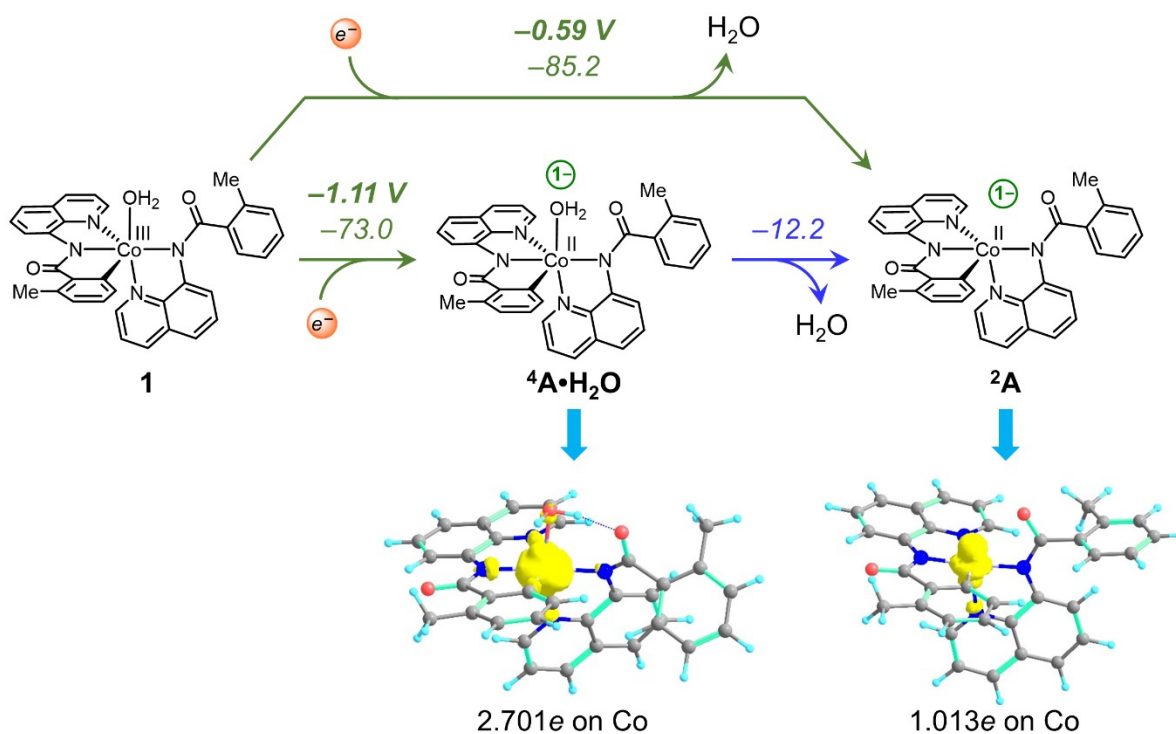

**Fig. S20** DFT calculated free energy change (in kcal/mol) and reduction potential (in V vs. NHE) of **1**. Mulliken spin density plots (isosurface = 0.01 au) of open-shell molecules.

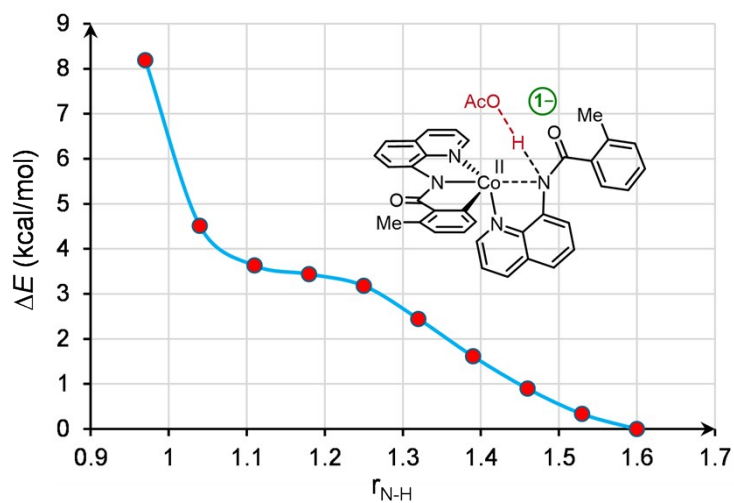

**Fig. S21** Potential energy surface (PES) calculated at the PBE0-D3(SMD-DMF)/def2-TZVP(Co)/def2-SVP(nonmetals) level of theory for the protonation step in the active catalyst **2A**.

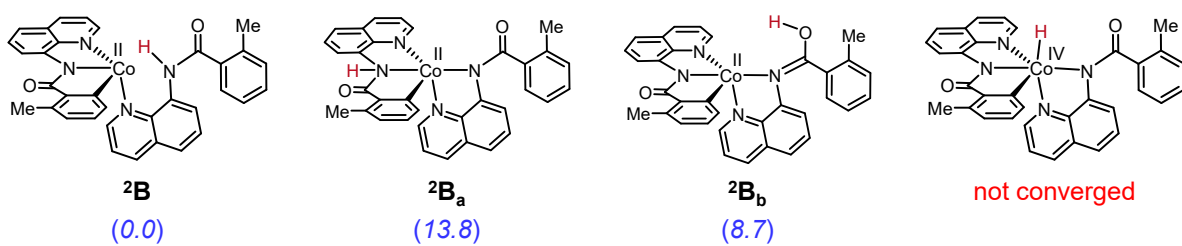

**Fig. S22** Relative energies of different regioisomer of  ${}^2\mathbf{B}$ .

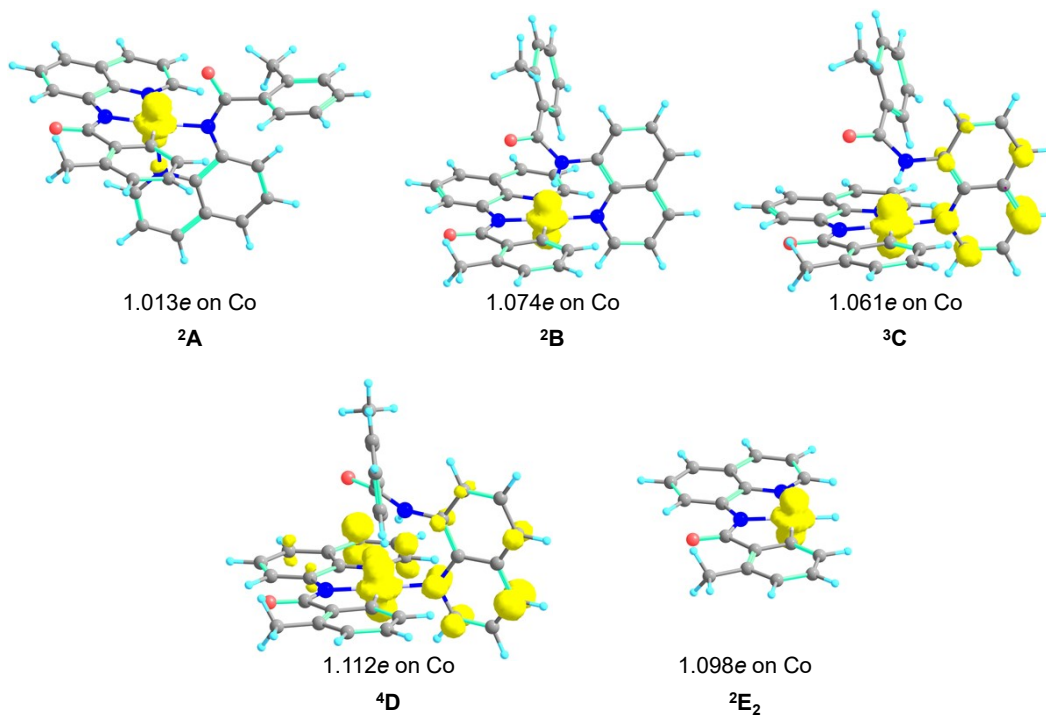

**Fig. S23** Mulliken spin density plots (isosurface = 0.01 au) of open-shell intermediates involved in catalytic cycle.

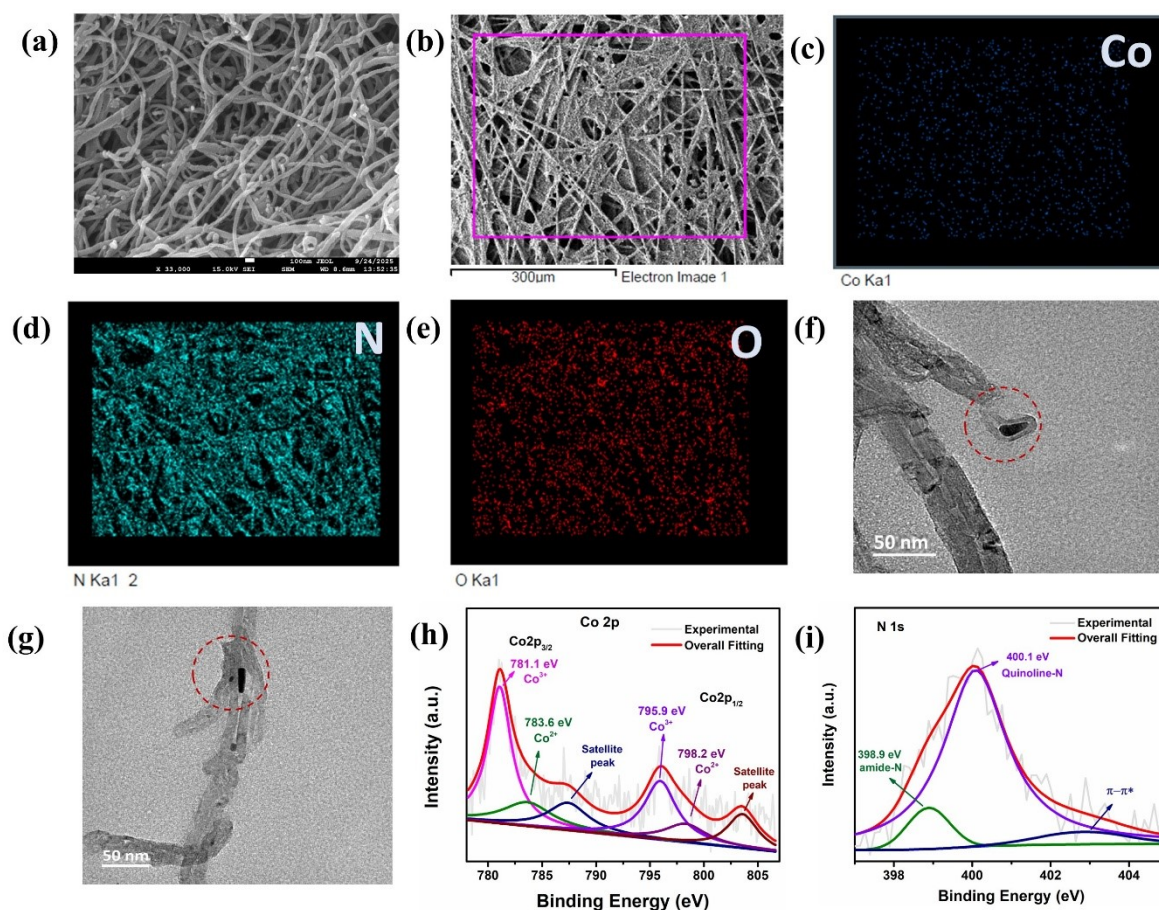

**Fig. S24** (a)-(b) FE-SEM images of 1/MWCNT@CP illustrating the deposition of 1/MWCNT on carbon paper; (c)-(e) elemental mapping of the elements through EDX in 1/MWCNT@CP : (c) Co, (d) N, (e) O; (f)-(g)TEM images of 1/MWCNT showing that the complex is embedded within the nanotubes; (h) high resolution XPS spectrum of Co 2p and (i) high resolution XPS of N1s.

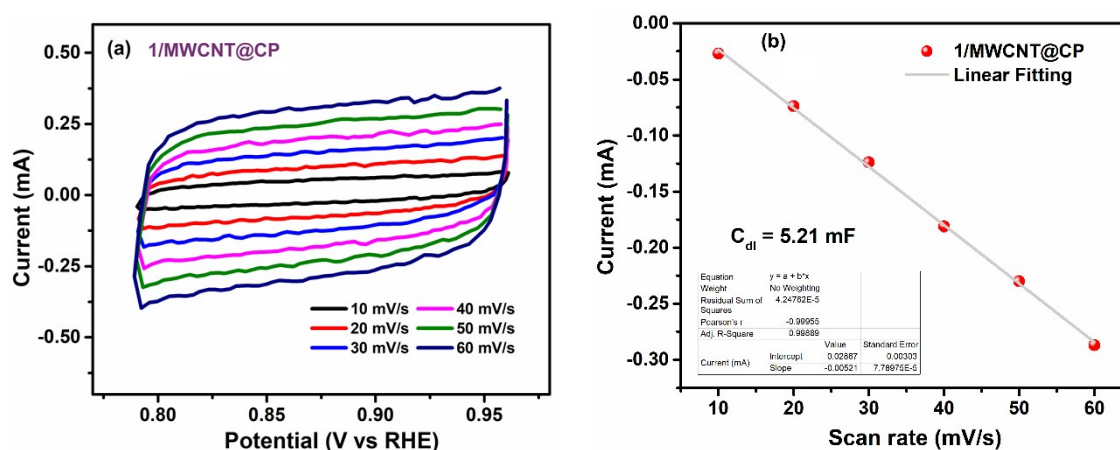

**Fig. S25** (a) CV of 1/MWCNT@CP in the non-faradaic region at various scan rates (10 mV/s to 60 mV/s) in the potential window of 0.79V to 0.96V in Ar-saturated 1M aqueous KOH solution; (b) Plot of scan rate vs current from (a) for the calculation of double layer capacitance ( $C_{dl}$ ).

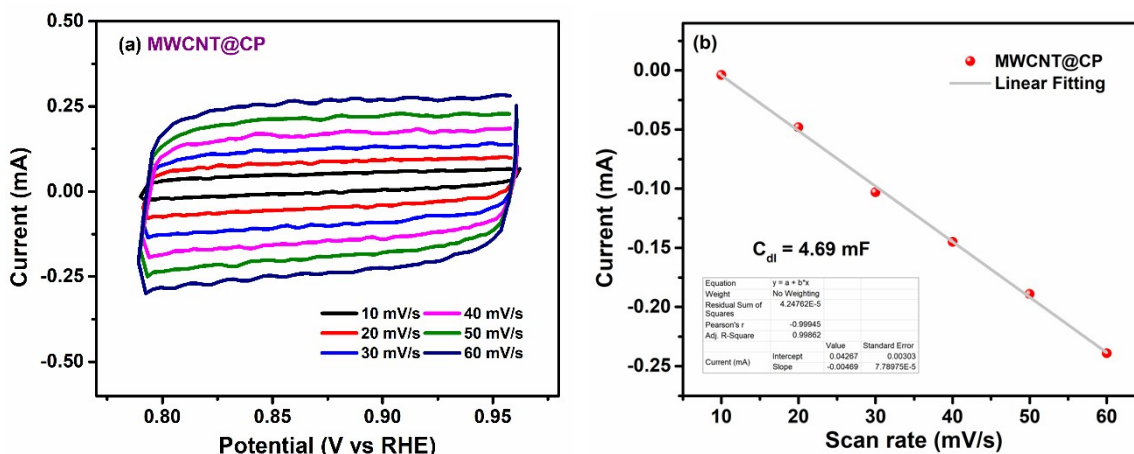

**Fig. S26** (a) CV of MWCNT@CP in the non-faradaic region at various scan rates (10 mV/s to 60 mV/s) in the potential window of 0.79V to 0.96V in Ar-saturated 1M aqueous KOH solution (b) Plot of scan rate vs current from (a) for the calculation of double layer capacitance ( $C_{dl}$ ).

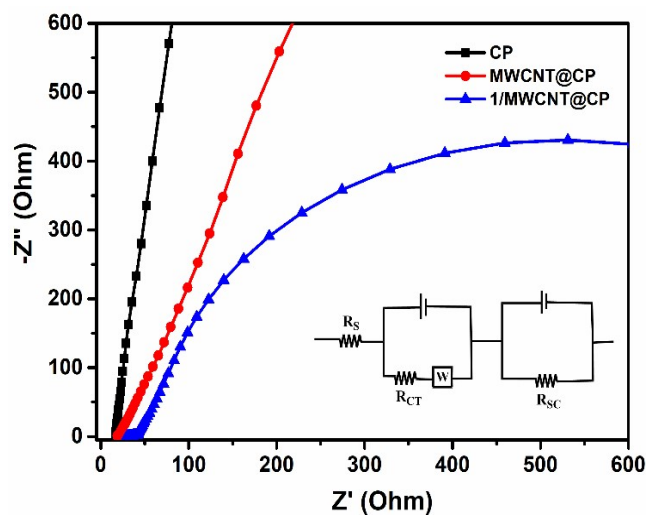

**Fig. S27** EIS Nyquist plot of 1/MWCNT@CP (red) and MWCNT@CP (blue) in 1.0 M aqueous KOH solution. (Inset: Equivalent Circuit used to fit the Nyquist plot)

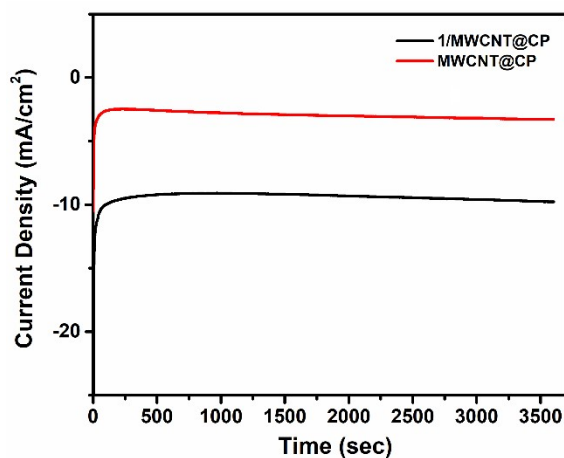

**Fig. S28** Constant Potential Electrolysis (CPE) recorded at -0.40 V in 1.0 M KOH for 1 hour using 1/MWCNT@CP (black) and MWCNT@CP (red)

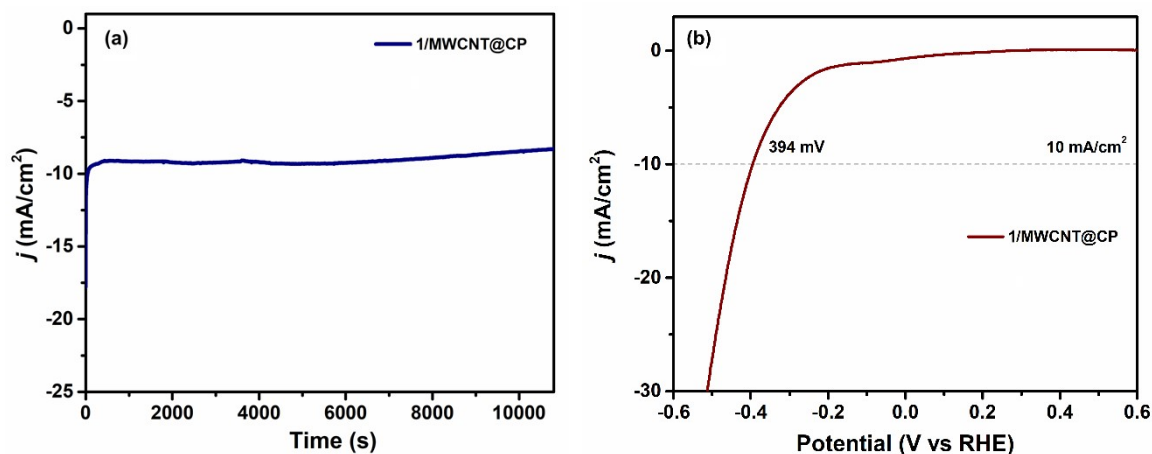

**Fig. S29** (a) CPE recorded at -0.40 V in 1.0 M KOH for 3 hrs with 1/MWCNT@CP; (b) LSV recorded at 5 mV/s in Ar saturated 1.0 M KOH using 1/MWCNT@CP after bulk electrolysis for 3 hrs.

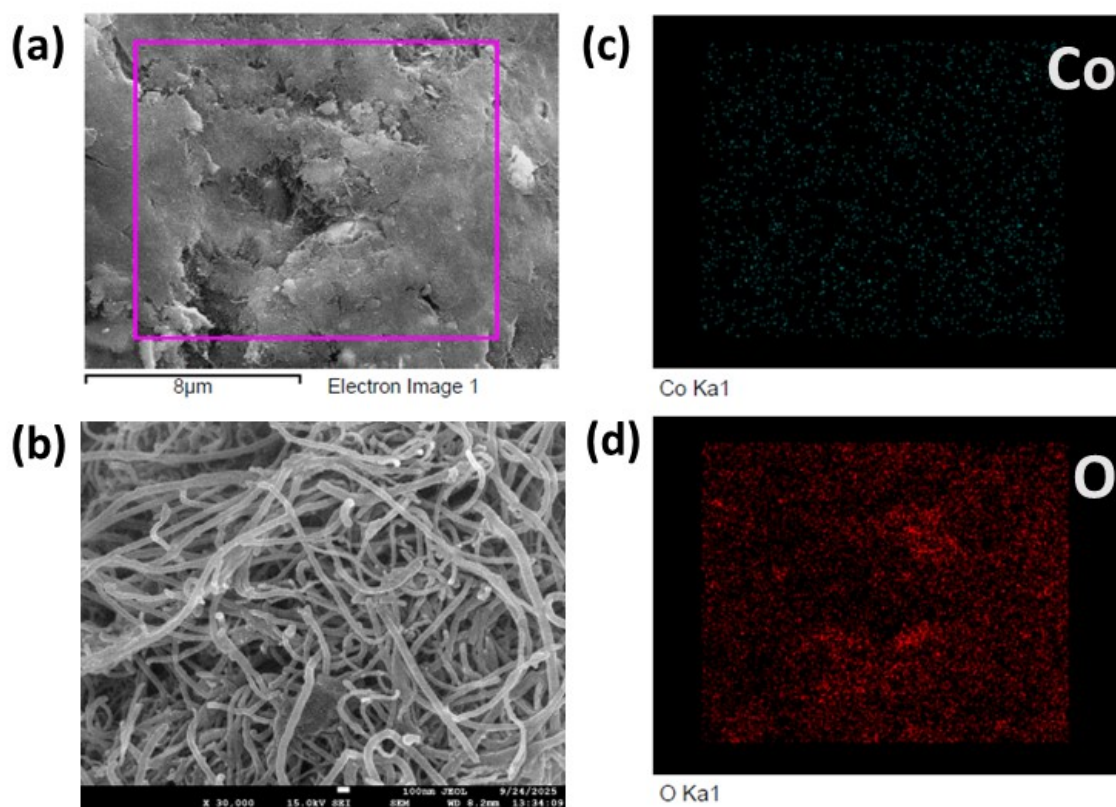

**Fig. S30** (a)-(b) FE-SEM images of 1/MWCNT@CP after CPE at -0.40 V vs RHE for 3 hrs in 1.0 M KOH; (c)-(d) elemental mapping of the elements through EDX in 1/MWCNT@CP : (c) Co, (e) O indicating the presence of Co after bulk electrolysis.

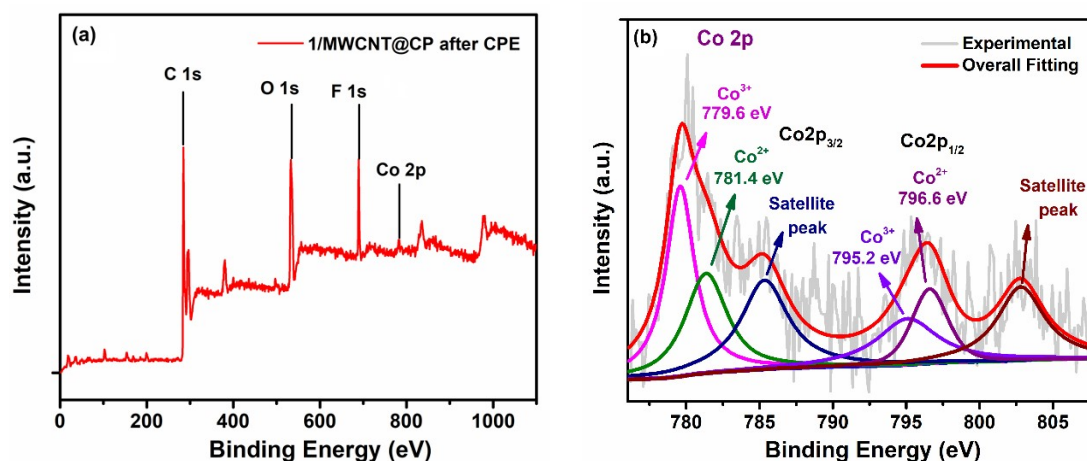

**Fig. S31.** (a) XPS survey spectrum of 1/MWCNT@CP after bulk electrolysis for 3 hrs indicating the presence of C, O and Co along F coming from nafion used as binder; (b) High resolution XPS spectrum of Co 2p after bulk electrolysis.

## References

- [1] S.-L. Meng, C. Zhang, C. Ye, J.-H. Li, S. Zhou, L. Zhu, X.-B. Li, C.-H. Tung, L.-Z. Wu, *Energy Environ. Sci.* **2023**, *16*, 1590-1596.
- [2] N. Li, Y. Li, Y. Han, W. Pan, T. Zhang, B. Tang, *Anal. Chem.* **2014**, *86*, 3924-3930.
- [3] J. Y. Park, H. Y. Kim, Y.-I. Kim, S. Y. Jo, S. A. Abbas, D. Seo, A. Ma, K. M. Nam, *J. Mat. Chem. A* **2022**, *10*, 12047-1205.
- [4] M. J. Frisch, G. W. Trucks, H. B. Schlegel, G. E. Scuseria, M. A. Robb, J. R. Cheeseman, G. Scalmani, V. Barone, B. Mennucci, G. A. Petersson, H. Nakatsuji, M. Caricato, X. Li, H. P. Hratchian, A. F. Izmaylov, J. Bloino, G. Zheng, J. L. Sonnenberg, M. Hada, M. Ehara, K. Toyota, R. Fukuda, J. Hasegawa, M. Ishida, T. Nakajima, Y. Honda, O. Kitao, H. Nakai, T. Vreven, J. E., Jr. Peralta, F. Ogliaro, M. Bearpark, J. J. Heyd, E. Brothers, K. N. Kudin, V. N. Staroverov, R. Kobayashi, J. Normand, K. Raghavachari, A. Rendell, J. C. Burant, S. S. Iyengar, J. Tomasi, M. Cossi, N. Rega, J. M. Millam, M. Klene, J. E. Knox, J. B. Cross, V. Bakken, C. Adamo, J. Jaramillo, R. Gomperts, R. E. Stratmann, O. Yazyev, A. J. Austin, R. Cammi, C. Pomelli, J. W. Ochterski, R. L. Martin, K. Morokuma, V. G. Zakrzewski, G. A. Voth, P. Salvador, J. J. Dannenberg, S. Dapprich, A. D. Daniels, Farkas;; J. B. Foresman, J. V. Ortiz, J. Cioslowski, D. J. Fox, *Gaussian 16, revision B.01* **2016**, Gaussian Inc., Wallingford, CT, .
- [5] C. Adamo and V. Barone, *J. Chem. Phys.*, 1999, **110**, 6158-6170.
- [6] S. Grimme, J. Antony, S. Ehrlich and H. Krieg, *J. Chem. Phys.*, 2010, **132**, 154104.
- [7] A. V. Marenich, C. J. Cramer and D. G. Truhlar, *J. Phys. Chem. B*, 2009, **113**, 6378-6396.
- [8] F. Weigend and R. Ahlrichs, *Phys. Chem. Chem. Phys.*, 2005, **7**, 3297-3305.
- [9] Y. Zhao and D. G. Truhlar, *Theor. Chem. Acc.*, 2008, **120**, 215-241.

- [10] A. Z. Haddad, S. P. Cronin, M. S. Mashuta, R. M. Buchanan and C. A. Grapperhaus, *Inorg. Chem.*, 2017, **56**, 11254-11265
- [11] C. C. L. McCrory, S. Jung, I. M. Ferrer, S. M. Chatman, J. C. Peters and T. F. Jaramillo, *J. Am. Chem. Soc.*, 2015, **137**, 4347-4357.
- [12] S. Anantharaj, P. E. Karthik and S. Noda, *Angew. Chem. Int. Ed.*, 2021, **60**, 23051-23067.
- [13] K. Banerjee, A. Roy, S. Ghosh, H. R. Inta, A. Mondal, S. Ghosh, A. Mitra, A. K. Mahato and V. Mahalingam, *ACS Appl. Energy Mater.*, 2024, **7**, 7745-7758.
- [14] S. Hadimane, S. Aralekallu, K. Prabhu CP, M. Hojamberdiev, and L. K. Sannegowda, *ACS Appl. Energy Mater.* **2021**, *4*, 10826–10834.
- [15] E. S. Andreiadis, P.-A. Jacques, P. D. Tran, A. Leyris, M. Chavarot-Kerlidou, B. Jusselme, M. Matheron, J. Pécaut, S. Palacin, M. Fontecave and V. Artero, *Nature Chem*, 2013, **5**, 48-53.
- [16] C. Taechaworaphong, M. Juthathan, P. Thamyongkit, T. Tuntulani and P. Leeladee, *ChemPlusChem*, 2024, **89**, e202300679.
- [17] E. Benazzi, F. Begato, A. Niorettini, L. Destro, K. Wurst, G. Licini, S. Agnoli, C. Zonta and M. Natali, *J. Mater. Chem. A*, 2021, **9**, 20032-20039.
- [18] S. Gümrükçü, E. Kaplan, T. Karazehir, M. Özçeşmeci, İ. Özçeşmeci and E. Hamuryudan, *Int. J. Hydrog. Energy*, 2024, **89**, 462-473.
- [19] B. Jin, X. Tan, X.-X. Zhang, Z.-Y. Wang, Y.-P. Qu, Y.-B. He, T.-P. Hu and P.-H. Zhao, *Electrochim. Acta*, 2022, **434**, 141325.
- [20] S. Maity, R. Kancherla, U. Dhawa, E. Hoque, S. Pimparkar and D. Maiti, *ACS Catal.*, 2016, **6**, 5493-5499.
- [21] L.-P. Xu, E. E. L. N. Liu, J. Bacsá, C. E. MacBeth and D. G. Musaev, *Chem. Sci.*, 2020, **11**, 6085-6096.

**Cartesian coordinates** (Å) of the optimized structures of all intermediates and transition states at PBE0-D3(SMD-DMF)/def2-TZVP(Co)/def2-SVP(non-metals) level of theory. *E* represents the absolute electronic energy in Hartree at M06(SMD-DMF)/def2-TZVPP level of theory.

**2**

69

*E*: -3138.88719460

|    |          |           |          |
|----|----------|-----------|----------|
| Co | 4.872745 | 12.311022 | 2.890450 |
| O  | 2.701500 | 14.457285 | 1.964061 |
| O  | 4.475524 | 12.975162 | 1.093959 |
| H  | 3.700075 | 13.617934 | 1.318018 |
| H  | 4.083906 | 12.246848 | 0.591270 |
| N  | 3.823786 | 13.730268 | 3.790456 |
| N  | 5.261852 | 11.751813 | 4.679310 |
| O  | 5.914491 | 8.870132  | 1.153703 |
| N  | 6.580475 | 13.385739 | 2.847003 |
| N  | 5.944225 | 10.976872 | 2.089924 |
| C  | 1.856484 | 15.247410 | 3.991738 |
| C  | 2.859658 | 14.452904 | 3.205492 |
| C  | 3.948367 | 14.844328 | 6.037359 |
| H  | 3.468732 | 15.765383 | 5.711212 |

|   |           |           |          |
|---|-----------|-----------|----------|
| C | 2.163771  | 11.100536 | 3.193368 |
| H | 1.807541  | 12.001960 | 3.693814 |
| C | 8.902777  | 13.166806 | 2.164296 |
| C | 4.164675  | 13.805342 | 5.137225 |
| C | 5.911972  | 10.665335 | 5.049357 |
| H | 6.175455  | 9.956808  | 4.263704 |
| C | 1.713812  | 8.871016  | 2.355532 |
| H | 1.011953  | 8.045720  | 2.202800 |
| C | 0.999060  | 14.588819 | 4.878268 |
| H | 1.113973  | 13.514297 | 5.042230 |
| C | 4.903310  | 12.679749 | 5.609353 |
| C | 3.484743  | 11.003099 | 2.757246 |
| C | 4.968190  | 13.599561 | 7.868826 |
| H | 5.255779  | 13.510698 | 8.918785 |
| C | 7.588363  | 12.647275 | 2.308080 |
| C | 7.256754  | 11.318958 | 1.878993 |
| C | 3.912218  | 9.816775  | 2.123771 |
| C | 6.271832  | 10.428618 | 6.389820 |
| H | 6.803823  | 9.509248  | 6.640072 |
| C | 5.279015  | 12.548566 | 6.972830 |
| C | 5.971604  | 11.370285 | 7.345307 |
| H | 6.265535  | 11.229359 | 8.388723 |
| C | 1.740102  | 16.635397 | 3.780844 |
| C | 5.351315  | 9.803603  | 1.721648 |
| C | 3.034188  | 8.730905  | 1.908615 |
| C | 4.341302  | 14.727992 | 7.387033 |
| H | 4.134214  | 15.563747 | 8.060385 |
| C | 3.455701  | 7.457370  | 1.235321 |
| H | 2.611461  | 6.754604  | 1.176555 |
| H | 4.285098  | 6.974011  | 1.772589 |
| H | 3.833868  | 7.645365  | 0.219538 |
| C | 6.806921  | 14.622566 | 3.238093 |
| H | 5.957855  | 15.173153 | 3.650468 |
| C | 8.078528  | 15.221975 | 3.134501 |
| H | 8.214871  | 16.249784 | 3.475818 |
| C | 9.120825  | 14.496517 | 2.605000 |
| H | 10.119497 | 14.932404 | 2.513689 |
| C | 9.578187  | 11.067723 | 1.186953 |
| H | 10.348559 | 10.429995 | 0.743929 |
| C | 8.273967  | 10.545264 | 1.318806 |
| H | 8.040409  | 9.536795  | 0.984137 |
| C | 9.906081  | 12.344512 | 1.593016 |
| H | 10.919964 | 12.735658 | 1.481112 |
| C | 1.282995  | 10.036021 | 2.989958 |
| H | 0.245966  | 10.113886 | 3.331181 |
| C | 2.661924  | 17.362953 | 2.846781 |
| H | 3.718038  | 17.147730 | 3.077796 |
| H | 2.512399  | 18.449848 | 2.909618 |
| H | 2.497195  | 17.044587 | 1.806769 |
| C | 0.751420  | 17.325717 | 4.492348 |
| H | 0.656945  | 18.406411 | 4.350998 |
| C | -0.108952 | 16.667426 | 5.371178 |
| H | -0.873965 | 17.233870 | 5.909052 |
| C | 0.010555  | 15.291860 | 5.563099 |
| H | -0.658161 | 14.766501 | 6.249598 |

3I

66

E: -3062.42464817

|    |          |           |           |
|----|----------|-----------|-----------|
| Co | 4.953272 | 12.190887 | 3.201945  |
| O  | 3.276674 | 13.796154 | 2.067002  |
| N  | 3.892690 | 13.518604 | 4.166927  |
| N  | 5.505181 | 11.768757 | 5.206106  |
| O  | 5.633433 | 9.076724  | 0.794397  |
| N  | 6.519890 | 13.397481 | 2.831591  |
| N  | 5.786500 | 11.078553 | 1.935119  |
| C  | 2.115485 | 15.175678 | 3.609718  |
| C  | 3.132161 | 14.135825 | 3.251871  |
| C  | 3.241079 | 14.345187 | 6.433982  |
| H  | 2.531391 | 15.086091 | 6.068050  |
| C  | 2.467866 | 10.763632 | 4.008728  |
| H  | 2.221852 | 11.585376 | 4.685121  |
| C  | 8.530755 | 13.496602 | 1.473222  |
| C  | 3.938511 | 13.540204 | 5.537947  |
| C  | 6.347340 | 10.854080 | 5.637446  |
| H  | 6.835004 | 10.236117 | 4.877195  |
| C  | 1.914057 | 8.602070  | 3.055963  |
| H  | 1.233877 | 7.747357  | 2.996785  |
| C  | 0.769002 | 14.800093 | 3.629000  |
| H  | 0.497488 | 13.763990 | 3.408224  |
| C  | 4.850163 | 12.569218 | 6.085261  |
| C  | 3.622842 | 10.794787 | 3.229903  |
| C  | 4.316592 | 13.295568 | 8.359121  |
| H  | 4.461904 | 13.207251 | 9.438195  |
| C  | 7.347641 | 12.843570 | 1.903116  |
| C  | 6.962509 | 11.564677 | 1.388843  |
| C  | 3.921777 | 9.724879  | 2.368109  |
| C  | 6.612056 | 10.667080 | 7.009493  |
| H  | 7.321562 | 9.898439  | 7.321384  |
| C  | 5.041863 | 12.445092 | 7.487717  |
| C  | 5.959728 | 11.457782 | 7.927838  |
| H  | 6.136172 | 11.334460 | 8.999906  |
| C  | 2.495968 | 16.503616 | 3.879763  |
| C  | 5.188720 | 9.882539  | 1.599905  |
| C  | 3.069516 | 8.604021  | 2.263921  |
| C  | 3.439180 | 14.214642 | 7.825524  |
| H  | 2.872124 | 14.870542 | 8.491653  |
| C  | 3.354811 | 7.444862  | 1.355369  |
| H  | 2.563218 | 6.685919  | 1.438028  |
| H  | 4.321952 | 6.976902  | 1.592157  |
| H  | 3.429683 | 7.766678  | 0.305911  |
| C  | 6.815875 | 14.564711 | 3.369623  |
| H  | 6.114946 | 14.952128 | 4.112024  |
| C  | 7.969937 | 15.282811 | 3.005346  |
| H  | 8.171044 | 16.246641 | 3.476218  |
| C  | 8.820408 | 14.752914 | 2.059328  |
| H  | 9.722975 | 15.289447 | 1.754212  |
| C  | 8.963093 | 11.633194 | 0.005097  |
| H  | 9.585232 | 11.138434 | -0.745797 |
| C  | 7.787692 | 10.975658 | 0.436262  |

|   |           |           |          |
|---|-----------|-----------|----------|
| H | 7.517530  | 10.003491 | 0.029800 |
| C | 9.343235  | 12.861769 | 0.499000 |
| H | 10.255873 | 13.356037 | 0.158300 |
| C | 1.615330  | 9.661262  | 3.913985 |
| H | 0.703818  | 9.625943  | 4.518425 |
| C | 3.940837  | 16.905060 | 3.885267 |
| H | 4.459001  | 16.483587 | 4.763477 |
| H | 4.050755  | 17.997809 | 3.926212 |
| H | 4.467078  | 16.539209 | 2.990251 |
| C | 1.487293  | 17.427706 | 4.176228 |
| H | 1.765455  | 18.464987 | 4.384777 |
| C | 0.144145  | 17.051845 | 4.211287 |
| H | -0.621693 | 17.794732 | 4.449962 |
| C | -0.218956 | 15.733789 | 3.937472 |
| H | -1.269373 | 15.432312 | 3.959147 |

### <sup>3</sup>II

67

E: -3062.87063739

|    |          |           |           |
|----|----------|-----------|-----------|
| Co | 6.540080 | 10.728895 | 4.736742  |
| O  | 4.919417 | 14.012230 | 5.439534  |
| N  | 5.684700 | 12.145202 | 6.434257  |
| N  | 7.041825 | 9.750807  | 6.385606  |
| O  | 4.287399 | 12.346091 | 1.880830  |
| N  | 8.366653 | 11.525372 | 4.386108  |
| N  | 6.035335 | 11.765643 | 3.271165  |
| C  | 6.972770 | 14.287550 | 6.613834  |
| C  | 5.788345 | 13.527242 | 6.130795  |
| C  | 5.834613 | 12.126109 | 8.893488  |
| H  | 5.310970 | 13.083725 | 8.938037  |
| C  | 4.181972 | 9.037587  | 5.380604  |
| H  | 4.745394 | 8.555356  | 6.181986  |
| C  | 9.387822 | 13.284904 | 3.057671  |
| C  | 6.093617 | 11.553577 | 7.667333  |
| C  | 7.653823 | 8.581257  | 6.308655  |
| H  | 7.843385 | 8.193719  | 5.303862  |
| C  | 2.117112 | 9.267764  | 4.125540  |
| H  | 1.081661 | 8.958351  | 3.957345  |
| C  | 8.163883 | 13.619370 | 6.937517  |
| H  | 8.213249 | 12.534202 | 6.874908  |
| C  | 6.766058 | 10.304290 | 7.600763  |
| C  | 4.745787 | 10.029754 | 4.582475  |
| C  | 6.881471 | 10.271535 | 10.046597 |
| H  | 7.188076 | 9.765813  | 10.965168 |
| C  | 8.275055 | 12.486163 | 3.424325  |
| C  | 7.000170 | 12.644329 | 2.801265  |
| C  | 3.999962 | 10.639571 | 3.560596  |
| C  | 8.052785 | 7.862136  | 7.448913  |
| H  | 8.552758 | 6.900452  | 7.326007  |
| C  | 7.154973 | 9.649793  | 8.802996  |
| C  | 7.807236 | 8.398050  | 8.691571  |
| H  | 8.109430 | 7.872353  | 9.601025  |
| C  | 6.915063 | 15.701153 | 6.698803  |
| C  | 4.740571 | 11.677860 | 2.794741  |
| C  | 2.662393 | 10.271103 | 3.312353  |

|   |           |           |           |
|---|-----------|-----------|-----------|
| C | 6.239562  | 11.487653 | 10.085711 |
| H | 6.026726  | 11.967231 | 11.043615 |
| C | 1.832181  | 10.902400 | 2.235900  |
| H | 0.826141  | 10.459745 | 2.214961  |
| H | 2.296522  | 10.777651 | 1.246349  |
| H | 1.739666  | 11.988062 | 2.388433  |
| C | 9.528449  | 11.286240 | 4.969365  |
| H | 9.550902  | 10.503633 | 5.731624  |
| C | 10.688098 | 12.013512 | 4.651900  |
| H | 11.622180 | 11.780178 | 5.165247  |
| C | 10.614248 | 13.018405 | 3.711094  |
| H | 11.495707 | 13.613028 | 3.456730  |
| C | 7.974560  | 14.440567 | 1.483159  |
| H | 7.831112  | 15.209778 | 0.719740  |
| C | 6.868722  | 13.631232 | 1.830804  |
| H | 5.907375  | 13.772292 | 1.342299  |
| C | 9.211823  | 14.284619 | 2.067626  |
| H | 10.060232 | 14.911276 | 1.783959  |
| C | 2.857948  | 8.659784  | 5.138106  |
| H | 2.396478  | 7.880939  | 5.752083  |
| C | 5.690333  | 16.506090 | 6.380950  |
| H | 5.479934  | 16.495157 | 5.301285  |
| H | 5.828464  | 17.548439 | 6.700780  |
| H | 4.792621  | 16.101323 | 6.870654  |
| C | 8.071956  | 16.375793 | 7.111079  |
| H | 8.038782  | 17.465698 | 7.192354  |
| C | 9.253442  | 15.703390 | 7.412782  |
| H | 10.136660 | 16.268699 | 7.721880  |
| C | 9.303387  | 14.313561 | 7.323262  |
| H | 10.222037 | 13.769433 | 7.554219  |
| H | 4.738028  | 11.850175 | 6.176305  |

## II<sub>a</sub>

67

E: -3062.86310247

|    |          |           |          |
|----|----------|-----------|----------|
| Co | 5.267884 | 11.837953 | 3.924257 |
| O  | 4.032814 | 13.444828 | 3.799887 |
| N  | 4.695343 | 12.439139 | 5.557263 |
| N  | 6.181717 | 10.479406 | 4.949620 |
| O  | 5.920697 | 9.275691  | 1.145851 |
| N  | 6.961192 | 12.898891 | 3.813522 |
| N  | 5.664239 | 11.422849 | 2.028249 |
| C  | 3.029608 | 14.296410 | 5.823596 |
| C  | 3.936363 | 13.405164 | 5.072964 |
| C  | 4.580444 | 11.787388 | 7.966491 |
| H  | 3.900622 | 12.589142 | 8.258580 |
| C  | 2.679017 | 10.422649 | 4.451563 |
| H  | 2.486356 | 11.045557 | 5.328849 |
| C  | 8.905825 | 13.215491 | 2.385302 |
| C  | 4.986919 | 11.665196 | 6.648744 |
| C  | 7.006078 | 9.526195  | 4.561595 |
| H  | 7.258325 | 9.478546  | 3.500117 |
| C  | 1.991867 | 8.582921  | 3.015137 |
| H  | 1.268035 | 7.799053  | 2.776163 |
| C  | 1.676265 | 14.273776 | 5.461099 |

|   |           |           |           |
|---|-----------|-----------|-----------|
| H | 1.352272  | 13.619218 | 4.648182  |
| C | 5.852718  | 10.589352 | 6.276448  |
| C | 3.815255  | 10.615192 | 3.666937  |
| C | 5.915394  | 9.842103  | 8.591701  |
| H | 6.280163  | 9.143579  | 9.348004  |
| C | 7.618635  | 12.674109 | 2.640118  |
| C | 6.979149  | 11.875034 | 1.659806  |
| C | 4.019164  | 9.770430  | 2.554894  |
| C | 7.551349  | 8.592883  | 5.465280  |
| H | 8.228095  | 7.825621  | 5.086037  |
| C | 6.337097  | 9.679740  | 7.246507  |
| C | 7.213542  | 8.660350  | 6.796967  |
| H | 7.611857  | 7.939262  | 7.515307  |
| C | 3.492961  | 15.144199 | 6.851150  |
| C | 5.257949  | 10.030278 | 1.805941  |
| C | 3.126997  | 8.727523  | 2.213909  |
| C | 5.052958  | 10.864777 | 8.926513  |
| H | 4.724078  | 10.976224 | 9.962650  |
| C | 3.364588  | 7.813568  | 1.051033  |
| H | 2.490270  | 7.171381  | 0.875575  |
| H | 4.239632  | 7.169695  | 1.229049  |
| H | 3.577978  | 8.375504  | 0.128727  |
| C | 7.529242  | 13.637976 | 4.743877  |
| H | 6.966006  | 13.777445 | 5.669454  |
| C | 8.800108  | 14.224126 | 4.574643  |
| H | 9.217995  | 14.830362 | 5.379913  |
| C | 9.487964  | 14.011819 | 3.402478  |
| H | 10.478102 | 14.446259 | 3.242162  |
| C | 8.885708  | 12.150255 | 0.208488  |
| H | 9.367675  | 11.936200 | -0.748120 |
| C | 7.597461  | 11.621305 | 0.457419  |
| H | 7.096758  | 11.017711 | -0.299302 |
| C | 9.527934  | 12.930103 | 1.143778  |
| H | 10.520194 | 13.341814 | 0.944245  |
| C | 1.771063  | 9.417320  | 4.113662  |
| H | 0.873134  | 9.273826  | 4.722194  |
| C | 4.949840  | 15.257416 | 7.189364  |
| H | 5.358886  | 14.317260 | 7.590785  |
| H | 5.115694  | 16.040383 | 7.941893  |
| H | 5.541110  | 15.513176 | 6.296155  |
| C | 2.544274  | 15.929563 | 7.516502  |
| H | 2.881347  | 16.600091 | 8.311964  |
| C | 1.191918  | 15.885142 | 7.178927  |
| H | 0.477900  | 16.509198 | 7.722935  |
| C | 0.753094  | 15.059593 | 6.144313  |
| H | -0.303785 | 15.027805 | 5.868816  |
| H | 4.949753  | 12.011874 | 1.578972  |

**<sup>3</sup>Π<sub>b</sub>**

67

E: -3062.86546363

|    |          |           |          |
|----|----------|-----------|----------|
| Co | 5.045373 | 12.148570 | 3.140887 |
| O  | 2.780174 | 14.103300 | 2.032631 |
| N  | 3.911395 | 13.656808 | 3.945767 |
| N  | 5.190208 | 11.664342 | 5.133732 |

|   |           |           |           |
|---|-----------|-----------|-----------|
| O | 5.800305  | 9.174947  | 0.590470  |
| N | 6.766806  | 13.211592 | 3.110508  |
| N | 5.979966  | 10.998291 | 1.993737  |
| C | 1.899726  | 15.114832 | 3.937789  |
| C | 2.945225  | 14.259916 | 3.328475  |
| C | 3.984790  | 14.954429 | 6.080349  |
| H | 3.570456  | 15.854052 | 5.626611  |
| C | 2.329025  | 10.970115 | 3.402910  |
| H | 2.082684  | 11.716293 | 4.160354  |
| C | 9.052361  | 13.012597 | 2.303453  |
| C | 4.199054  | 13.819328 | 5.317800  |
| C | 5.762473  | 10.593531 | 5.644215  |
| H | 6.029970  | 9.797695  | 4.942976  |
| C | 1.672999  | 9.057656  | 2.062461  |
| H | 0.905710  | 8.334942  | 1.770831  |
| C | 1.047309  | 14.547758 | 4.892015  |
| H | 1.179158  | 13.503721 | 5.185234  |
| C | 4.839768  | 12.703471 | 5.930591  |
| C | 3.586742  | 10.920726 | 2.809560  |
| C | 4.834862  | 13.859320 | 8.080403  |
| H | 5.057374  | 13.865754 | 9.149871  |
| C | 7.721850  | 12.532629 | 2.412110  |
| C | 7.313126  | 11.316522 | 1.783423  |
| C | 3.899549  | 9.926315  | 1.869918  |
| C | 6.037044  | 10.479533 | 7.021355  |
| H | 6.503180  | 9.569428  | 7.402251  |
| C | 5.133203  | 12.703131 | 7.319500  |
| C | 5.735935  | 11.535429 | 7.851300  |
| H | 5.963122  | 11.492788 | 8.919704  |
| C | 1.770712  | 16.461437 | 3.546139  |
| C | 5.307142  | 9.956407  | 1.387717  |
| C | 2.940175  | 8.974189  | 1.468924  |
| C | 4.298861  | 14.963890 | 7.456625  |
| H | 4.101194  | 15.872783 | 8.029440  |
| C | 3.228811  | 7.906354  | 0.457133  |
| H | 2.334621  | 7.292276  | 0.278181  |
| H | 4.048646  | 7.251966  | 0.789021  |
| H | 3.559621  | 8.339200  | -0.498674 |
| C | 7.071588  | 14.358607 | 3.691994  |
| H | 6.273794  | 14.873823 | 4.231445  |
| C | 8.364511  | 14.908067 | 3.635830  |
| H | 8.562850  | 15.856156 | 4.138337  |
| C | 9.351673  | 14.236032 | 2.949029  |
| H | 10.367043 | 14.637076 | 2.890363  |
| C | 9.589843  | 11.084017 | 0.959604  |
| H | 10.309366 | 10.496263 | 0.383384  |
| C | 8.263279  | 10.606243 | 1.058010  |
| H | 7.973387  | 9.681303  | 0.564700  |
| C | 9.993431  | 12.255490 | 1.560402  |
| H | 11.021039 | 12.615745 | 1.475288  |
| C | 1.371854  | 10.028271 | 3.017609  |
| H | 0.375936  | 10.052637 | 3.469247  |
| C | 2.693623  | 17.085887 | 2.542111  |
| H | 3.745542  | 16.821297 | 2.735089  |
| H | 2.608384  | 18.180958 | 2.562769  |

|   |           |           |          |
|---|-----------|-----------|----------|
| H | 2.457072  | 16.747064 | 1.521367 |
| C | 0.758509  | 17.213454 | 4.153920 |
| H | 0.648105  | 18.266089 | 3.879329 |
| C | -0.099686 | 16.651793 | 5.097682 |
| H | -0.881274 | 17.266672 | 5.551592 |
| C | 0.039379  | 15.313966 | 5.467208 |
| H | -0.630547 | 14.868646 | 6.206306 |
| H | 3.487203  | 13.553290 | 1.644381 |

**<sup>4</sup>A•H<sub>2</sub>O**

69

E: -3138.99098004

|    |          |           |          |
|----|----------|-----------|----------|
| Co | 4.806034 | 12.452418 | 2.747576 |
| O  | 2.639968 | 14.889562 | 2.048894 |
| O  | 4.337141 | 13.420358 | 0.663747 |
| H  | 3.706834 | 14.053430 | 1.102137 |
| H  | 3.776097 | 12.649716 | 0.500081 |
| N  | 3.975173 | 14.150511 | 3.727533 |
| N  | 5.274951 | 12.067934 | 4.840746 |
| O  | 5.807940 | 8.648867  | 1.340844 |
| N  | 6.842995 | 13.264935 | 2.632457 |
| N  | 5.943291 | 10.845290 | 2.041067 |
| C  | 1.768281 | 15.156999 | 4.215772 |
| C  | 2.866764 | 14.748761 | 3.265404 |
| C  | 4.313710 | 15.446228 | 5.797694 |
| H  | 3.851699 | 16.335192 | 5.364263 |
| C  | 1.897863 | 11.263245 | 2.364471 |
| H  | 1.476886 | 12.218899 | 2.702773 |
| C  | 9.167665 | 12.616529 | 2.392565 |
| C  | 4.412578 | 14.288064 | 5.028134 |
| C  | 5.880811 | 11.009259 | 5.332015 |
| H  | 5.999499 | 10.158568 | 4.653493 |
| C  | 1.527873 | 9.013882  | 1.573619 |
| H  | 0.840567 | 8.205639  | 1.302644 |
| C  | 1.265073 | 14.195895 | 5.099740 |
| H  | 1.719731 | 13.201492 | 5.117148 |
| C  | 5.101092 | 13.168692 | 5.613846 |
| C  | 3.292247 | 11.108276 | 2.283258 |
| C  | 5.418882 | 14.415275 | 7.705750 |
| H  | 5.792664 | 14.457759 | 8.731622 |
| C  | 7.774257 | 12.317550 | 2.359263 |
| C  | 7.297726 | 10.987963 | 2.028085 |
| C  | 3.779230 | 9.858422  | 1.815238 |
| C  | 6.373520 | 10.959537 | 6.653285 |
| H  | 6.866222 | 10.054257 | 7.013755 |
| C  | 5.588694 | 13.227417 | 6.951496 |
| C  | 6.233874 | 12.068992 | 7.454586 |
| H  | 6.617312 | 12.075282 | 8.478812 |
| C  | 1.202614 | 16.446607 | 4.173660 |
| C  | 5.280712 | 9.707867  | 1.704621 |
| C  | 2.909279 | 8.795276  | 1.458643 |
| C  | 4.801860 | 15.499603 | 7.119127 |
| H  | 4.686786 | 16.429964 | 7.682357 |
| C  | 3.367702 | 7.450473  | 0.962763 |
| H  | 2.501078 | 6.805382  | 0.748656 |

|   |           |           |          |
|---|-----------|-----------|----------|
| H | 4.014832  | 6.946522  | 1.695308 |
| H | 3.979095  | 7.539303  | 0.052941 |
| C | 7.213444  | 14.491740 | 2.931206 |
| H | 6.409196  | 15.205394 | 3.137547 |
| C | 8.566715  | 14.883075 | 2.991406 |
| H | 8.823535  | 15.913239 | 3.247067 |
| C | 9.537384  | 13.944837 | 2.724696 |
| H | 10.598497 | 14.207949 | 2.762615 |
| C | 9.648343  | 10.335626 | 1.783598 |
| H | 10.367885 | 9.543033  | 1.555177 |
| C | 8.274593  | 10.022730 | 1.743273 |
| H | 7.939104  | 9.019811  | 1.487427 |
| C | 10.108727 | 11.597299 | 2.099109 |
| H | 11.176745 | 11.827292 | 2.126479 |
| C | 1.019657  | 10.233990 | 2.018197 |
| H | -0.064525 | 10.375527 | 2.090644 |
| C | 1.732587  | 17.501268 | 3.247255 |
| H | 2.816447  | 17.647082 | 3.387290 |
| H | 1.232036  | 18.465451 | 3.414927 |
| H | 1.593839  | 17.203139 | 2.197983 |
| C | 0.142674  | 16.730172 | 5.043905 |
| H | -0.295280 | 17.732887 | 5.032959 |
| C | -0.362878 | 15.767474 | 5.918397 |
| H | -1.195681 | 16.018379 | 6.581115 |
| C | 0.196923  | 14.490929 | 5.944692 |
| H | -0.191820 | 13.727662 | 6.623925 |

<sup>2</sup>A

66

E: -3062.55934610

|    |          |           |          |
|----|----------|-----------|----------|
| Co | 4.889903 | 12.240081 | 3.059913 |
| O  | 3.160249 | 14.269836 | 2.009729 |
| N  | 3.835934 | 13.575294 | 4.034885 |
| N  | 5.526605 | 11.820406 | 5.031424 |
| O  | 5.807613 | 8.879984  | 1.040504 |
| N  | 6.466536 | 13.395729 | 2.691951 |
| N  | 5.855886 | 10.993357 | 1.975962 |
| C  | 2.020848 | 15.286158 | 3.778129 |
| C  | 3.061870 | 14.339759 | 3.239854 |
| C  | 3.293847 | 14.382786 | 6.347961 |
| H  | 2.587544 | 15.144328 | 6.025952 |
| C  | 2.259982 | 10.856002 | 3.628505 |
| H  | 1.917342 | 11.732021 | 4.190487 |
| C  | 8.646064 | 13.355634 | 1.602350 |
| C  | 3.938426 | 13.572714 | 5.404891 |
| C  | 6.385098 | 10.912484 | 5.442709 |
| H  | 6.876197 | 10.316861 | 4.665894 |
| C  | 1.837711 | 8.610654  | 2.823597 |
| H  | 1.176157 | 7.741366  | 2.751838 |
| C  | 0.731405 | 14.805871 | 4.024097 |
| H  | 0.517870 | 13.743104 | 3.876281 |
| C  | 4.872369 | 12.597699 | 5.929841 |
| C  | 3.527016 | 10.872858 | 3.022595 |
| C  | 4.406925 | 13.304603 | 8.234557 |
| H  | 4.579585 | 13.201755 | 9.308603 |

|   |           |           |           |
|---|-----------|-----------|-----------|
| C | 7.411679  | 12.745972 | 1.954464  |
| C | 7.086652  | 11.404788 | 1.544505  |
| C | 3.920564  | 9.706684  | 2.312275  |
| C | 6.670135  | 10.698978 | 6.807694  |
| H | 7.390080  | 9.930854  | 7.098375  |
| C | 5.099589  | 12.462751 | 7.330636  |
| C | 6.028945  | 11.473797 | 7.745798  |
| H | 6.223866  | 11.342278 | 8.813927  |
| C | 2.318331  | 16.650827 | 3.954677  |
| C | 5.285051  | 9.782931  | 1.698328  |
| C | 3.093061  | 8.565544  | 2.200570  |
| C | 3.530514  | 14.241109 | 7.729609  |
| H | 2.991912  | 14.902859 | 8.414277  |
| C | 3.492657  | 7.323054  | 1.454732  |
| H | 2.692553  | 6.568538  | 1.502782  |
| H | 4.417068  | 6.886916  | 1.861785  |
| H | 3.714707  | 7.538922  | 0.399023  |
| C | 6.693260  | 14.632682 | 3.093835  |
| H | 5.898652  | 15.104758 | 3.676548  |
| C | 7.887241  | 15.317709 | 2.792778  |
| H | 8.022300  | 16.340429 | 3.151013  |
| C | 8.859889  | 14.683846 | 2.052525  |
| H | 9.796826  | 15.189909 | 1.803295  |
| C | 9.259790  | 11.329808 | 0.441571  |
| H | 9.977821  | 10.758075 | -0.154407 |
| C | 8.036759  | 10.716001 | 0.781936  |
| H | 7.809873  | 9.701532  | 0.460281  |
| C | 9.578617  | 12.616160 | 0.830958  |
| H | 10.531512 | 13.075083 | 0.556321  |
| C | 1.424742  | 9.741787  | 3.531208  |
| H | 0.439123  | 9.747129  | 4.009676  |
| C | 3.709886  | 17.160635 | 3.722308  |
| H | 4.397048  | 16.787268 | 4.500991  |
| H | 3.746232  | 18.259062 | 3.742856  |
| H | 4.102924  | 16.815069 | 2.754244  |
| C | 1.297125  | 17.499763 | 4.396149  |
| H | 1.517013  | 18.561669 | 4.542840  |
| C | 0.012048  | 17.018537 | 4.652534  |
| H | -0.767047 | 17.703588 | 4.997948  |
| C | -0.274060 | 15.667015 | 4.463426  |
| H | -1.278906 | 15.281799 | 4.656558  |

**<sup>2</sup>B**

67

E: -3063.03552984

|    |          |           |          |
|----|----------|-----------|----------|
| Co | 6.533353 | 10.662317 | 4.676548 |
| O  | 4.865960 | 14.045343 | 5.486743 |
| N  | 5.779185 | 12.279626 | 6.542839 |
| N  | 6.948155 | 9.751158  | 6.344627 |
| O  | 4.466176 | 12.101215 | 1.563101 |
| N  | 8.365643 | 11.386738 | 4.365858 |
| N  | 6.135477 | 11.587029 | 3.073311 |
| C  | 6.815243 | 14.507182 | 6.769590 |
| C  | 5.731574 | 13.625917 | 6.231787 |
| C  | 6.304013 | 12.286680 | 8.925041 |

|   |           |           |           |
|---|-----------|-----------|-----------|
| H | 5.854241  | 13.276490 | 9.020207  |
| C | 3.942875  | 9.289684  | 5.436267  |
| H | 4.415302  | 8.867160  | 6.329516  |
| C | 9.557394  | 12.919990 | 2.895020  |
| C | 6.327111  | 11.672472 | 7.686623  |
| C | 7.415146  | 8.516395  | 6.257153  |
| H | 7.438628  | 8.078456  | 5.255185  |
| C | 1.974344  | 9.522372  | 4.046486  |
| H | 0.923735  | 9.286679  | 3.850278  |
| C | 8.140825  | 14.059325 | 6.735401  |
| H | 8.354548  | 13.055224 | 6.367439  |
| C | 6.883031  | 10.361023 | 7.566211  |
| C | 4.678995  | 10.110992 | 4.570996  |
| C | 7.344711  | 10.377645 | 9.983018  |
| H | 7.732554  | 9.864104  | 10.865907 |
| C | 8.385300  | 12.217451 | 3.283292  |
| C | 7.154260  | 12.342628 | 2.553262  |
| C | 4.014969  | 10.638114 | 3.434329  |
| C | 7.879362  | 7.786659  | 7.366378  |
| H | 8.250362  | 6.770589  | 7.222710  |
| C | 7.367914  | 9.704122  | 8.736973  |
| C | 7.868242  | 8.385947  | 8.602367  |
| H | 8.237446  | 7.863801  | 9.488844  |
| C | 6.512009  | 15.802412 | 7.239725  |
| C | 4.864228  | 11.521764 | 2.572091  |
| C | 2.661966  | 10.355461 | 3.150492  |
| C | 6.832121  | 11.650695 | 10.066509 |
| H | 6.804147  | 12.173216 | 11.025468 |
| C | 1.936922  | 10.899536 | 1.952893  |
| H | 0.899959  | 10.532323 | 1.928969  |
| H | 2.436797  | 10.615894 | 1.014926  |
| H | 1.924493  | 11.999585 | 1.956285  |
| C | 9.473956  | 11.198664 | 5.061400  |
| H | 9.413266  | 10.521936 | 5.917217  |
| C | 10.683885 | 11.845502 | 4.744419  |
| H | 11.567106 | 11.657443 | 5.357536  |
| C | 10.723184 | 12.709121 | 3.673080  |
| H | 11.645051 | 13.234393 | 3.408546  |
| C | 8.312178  | 13.894559 | 1.073777  |
| H | 8.263856  | 14.553575 | 0.201891  |
| C | 7.146323  | 13.191628 | 1.444063  |
| H | 6.225194  | 13.299478 | 0.875186  |
| C | 9.499881  | 13.776141 | 1.766720  |
| H | 10.394758 | 14.324687 | 1.463872  |
| C | 2.601433  | 8.996795  | 5.175334  |
| H | 2.035440  | 8.352968  | 5.856464  |
| C | 5.107676  | 16.326571 | 7.303461  |
| H | 4.713460  | 16.515220 | 6.294084  |
| H | 5.068901  | 17.263692 | 7.876375  |
| H | 4.423436  | 15.603012 | 7.772766  |
| C | 7.576712  | 16.603999 | 7.670855  |
| H | 7.358845  | 17.605476 | 8.052901  |
| C | 8.897533  | 16.159559 | 7.622250  |
| H | 9.703777  | 16.816506 | 7.959655  |
| C | 9.185303  | 14.880952 | 7.147414  |

|   |           |           |          |
|---|-----------|-----------|----------|
| H | 10.215958 | 14.520666 | 7.099684 |
| H | 5.044257  | 11.741334 | 6.068053 |

<sup>2</sup>B<sub>a</sub>

67

E: -3063.01352746

|    |           |           |           |
|----|-----------|-----------|-----------|
| Co | 5.241360  | 11.865205 | 3.616920  |
| O  | 3.679760  | 14.171644 | 3.973046  |
| N  | 4.539256  | 12.568060 | 5.277510  |
| N  | 6.162375  | 10.503065 | 4.962656  |
| O  | 6.159809  | 9.045301  | 1.273636  |
| N  | 6.925385  | 12.928295 | 3.537730  |
| N  | 5.804999  | 11.285964 | 1.779602  |
| C  | 2.988637  | 14.302605 | 6.208777  |
| C  | 3.774974  | 13.662674 | 5.096374  |
| C  | 4.303269  | 12.025665 | 7.710257  |
| H  | 3.605976  | 12.833621 | 7.919545  |
| C  | 2.521830  | 10.534760 | 3.936143  |
| H  | 2.239332  | 11.232653 | 4.730845  |
| C  | 9.005356  | 13.113511 | 2.276389  |
| C  | 4.791591  | 11.836654 | 6.413868  |
| C  | 7.001029  | 9.515011  | 4.733678  |
| H  | 7.343792  | 9.385050  | 3.702345  |
| C  | 1.986746  | 8.579267  | 2.592495  |
| H  | 1.286420  | 7.779907  | 2.332843  |
| C  | 1.631190  | 13.989763 | 6.326654  |
| H  | 1.188253  | 13.259996 | 5.642658  |
| C  | 5.696505  | 10.723229 | 6.219371  |
| C  | 3.759864  | 10.676797 | 3.289994  |
| C  | 5.564615  | 10.137890 | 8.601303  |
| H  | 5.861467  | 9.495678  | 9.433847  |
| C  | 7.695367  | 12.596091 | 2.459364  |
| C  | 7.148216  | 11.700014 | 1.504279  |
| C  | 4.068782  | 9.721135  | 2.288456  |
| C  | 7.448279  | 8.642965  | 5.747973  |
| H  | 8.144375  | 7.838366  | 5.502359  |
| C  | 6.083700  | 9.888202  | 7.307805  |
| C  | 6.985800  | 8.829376  | 7.028751  |
| H  | 7.301710  | 8.172012  | 7.843616  |
| C  | 3.578934  | 15.248275 | 7.068185  |
| C  | 5.411844  | 9.890913  | 1.700369  |
| C  | 3.215071  | 8.652167  | 1.931090  |
| C  | 4.689495  | 11.187713 | 8.775062  |
| H  | 4.273837  | 11.389053 | 9.766512  |
| C  | 3.583527  | 7.635620  | 0.891176  |
| H  | 2.727269  | 6.987016  | 0.656318  |
| H  | 4.415641  | 7.002088  | 1.234800  |
| H  | 3.926211  | 8.111867  | -0.040685 |
| C  | 7.408105  | 13.766829 | 4.431999  |
| H  | 6.756458  | 13.993515 | 5.278744  |
| C  | 8.691766  | 14.342555 | 4.326489  |
| H  | 9.031293  | 15.032524 | 5.101097  |
| C  | 9.491173  | 14.015590 | 3.256213  |
| H  | 10.494037 | 14.436922 | 3.148045  |
| C  | 9.196486  | 11.822169 | 0.233144  |

|   |           |           |           |
|---|-----------|-----------|-----------|
| H | 9.771889  | 11.508957 | -0.641211 |
| C | 7.885277  | 11.320367 | 0.405697  |
| H | 7.457451  | 10.635173 | -0.326324 |
| C | 9.746299  | 12.700709 | 1.140033  |
| H | 10.756735 | 13.092337 | 0.998558  |
| C | 1.646707  | 9.508410  | 3.583219  |
| H | 0.679078  | 9.417755  | 4.087813  |
| C | 5.039715  | 15.569983 | 6.961917  |
| H | 5.653607  | 14.704877 | 7.265650  |
| H | 5.312694  | 16.417461 | 7.606278  |
| H | 5.320163  | 15.818757 | 5.926757  |
| C | 2.775715  | 15.844270 | 8.047201  |
| H | 3.223089  | 16.578940 | 8.723530  |
| C | 1.424881  | 15.518623 | 8.177178  |
| H | 0.822157  | 15.996512 | 8.954255  |
| C | 0.848173  | 14.588887 | 7.312832  |
| H | -0.210416 | 14.331099 | 7.403084  |
| H | 5.126703  | 11.845927 | 1.248987  |

**<sup>2</sup>B<sub>g</sub>**

67

E: -3063.02246091

|    |          |           |          |
|----|----------|-----------|----------|
| Co | 4.907735 | 12.227137 | 3.054951 |
| O  | 2.657388 | 13.976292 | 2.109154 |
| N  | 3.810657 | 13.597392 | 4.003339 |
| N  | 5.231104 | 11.640268 | 5.049326 |
| O  | 5.837955 | 9.085365  | 0.741712 |
| N  | 6.604525 | 13.286465 | 3.044095 |
| N  | 5.918556 | 11.027874 | 1.987896 |
| C  | 1.887249 | 15.188203 | 3.957172 |
| C  | 2.860414 | 14.222792 | 3.388336 |
| C  | 3.855315 | 14.802837 | 6.197744 |
| H  | 3.361129 | 15.691019 | 5.807846 |
| C  | 2.132137 | 11.000139 | 3.138667 |
| H  | 1.770472 | 11.814890 | 3.774819 |
| C  | 8.915554 | 13.137120 | 2.283681 |
| C  | 4.123677 | 13.725343 | 5.369233 |
| C  | 5.890922 | 10.597120 | 5.501649 |
| H  | 6.176095 | 9.841038  | 4.763043 |
| C  | 1.677699 | 8.900677  | 2.022483 |
| H  | 0.980942 | 8.093674  | 1.775515 |
| C  | 0.874045 | 14.707623 | 4.791755 |
| H  | 0.825406 | 13.640036 | 5.022266 |
| C  | 4.857687 | 12.621412 | 5.907583 |
| C  | 3.453474 | 11.001326 | 2.666534 |
| C  | 4.864152 | 13.686578 | 8.110070 |
| H  | 5.133580 | 13.664176 | 9.168799 |
| C  | 7.597638 | 12.617169 | 2.389615 |
| C  | 7.234908 | 11.361625 | 1.793810 |
| C  | 3.861856 | 9.899931  | 1.870829 |
| C  | 6.238360 | 10.445827 | 6.861788 |
| H  | 6.778906 | 9.553764  | 7.184099 |
| C  | 5.206396 | 12.586810 | 7.285404 |
| C  | 5.906448 | 11.443387 | 7.748044 |
| H  | 6.180296 | 11.375843 | 8.804306 |

|   |           |           |           |
|---|-----------|-----------|-----------|
| C | 1.987707  | 16.554982 | 3.638417  |
| C | 5.298552  | 9.931623  | 1.453845  |
| C | 2.990893  | 8.839832  | 1.534647  |
| C | 4.223675  | 14.774169 | 7.560697  |
| H | 3.985460  | 15.640274 | 8.182886  |
| C | 3.404141  | 7.664798  | 0.694649  |
| H | 2.562722  | 6.967402  | 0.565917  |
| H | 4.248669  | 7.123155  | 1.146012  |
| H | 3.758117  | 7.982069  | -0.297343 |
| C | 6.865242  | 14.464350 | 3.582391  |
| H | 6.040436  | 14.972856 | 4.086996  |
| C | 8.141016  | 15.058540 | 3.525776  |
| H | 8.297154  | 16.032902 | 3.992620  |
| C | 9.163271  | 14.396433 | 2.885177  |
| H | 10.165517 | 14.829825 | 2.827056  |
| C | 9.539072  | 11.178162 | 1.021335  |
| H | 10.291200 | 10.596439 | 0.480221  |
| C | 8.230146  | 10.659117 | 1.110163  |
| H | 7.974065  | 9.708806  | 0.646611  |
| C | 9.895024  | 12.385686 | 1.586230  |
| H | 10.912044 | 12.776266 | 1.504382  |
| C | 1.253027  | 9.963724  | 2.819281  |
| H | 0.224610  | 9.980375  | 3.194722  |
| C | 3.084535  | 17.060792 | 2.749747  |
| H | 4.071368  | 16.712557 | 3.096136  |
| H | 3.099288  | 18.158929 | 2.721977  |
| H | 2.960522  | 16.693848 | 1.718778  |
| C | 1.042320  | 17.421333 | 4.198837  |
| H | 1.106545  | 18.489749 | 3.974315  |
| C | 0.030173  | 16.949130 | 5.034261  |
| H | -0.693655 | 17.650722 | 5.457305  |
| C | -0.059514 | 15.589365 | 5.330291  |
| H | -0.852242 | 15.214162 | 5.981979  |
| H | 3.212832  | 13.193585 | 1.872817  |

<sup>3</sup>C

67

E: -3063.12804343

|    |          |           |          |
|----|----------|-----------|----------|
| Co | 6.555906 | 10.711315 | 4.672898 |
| O  | 5.025986 | 14.163409 | 5.376017 |
| N  | 5.724974 | 12.338899 | 6.502669 |
| N  | 7.018753 | 9.859913  | 6.350962 |
| O  | 4.423031 | 12.027385 | 1.539586 |
| N  | 8.373577 | 11.453048 | 4.302760 |
| N  | 6.125297 | 11.578187 | 3.035882 |
| C  | 6.897396 | 14.477081 | 6.811038 |
| C  | 5.798193 | 13.670761 | 6.184741 |
| C  | 5.988658 | 12.310659 | 8.938808 |
| H  | 5.478124 | 13.275484 | 8.981889 |
| C  | 4.008336 | 9.286186  | 5.477336 |
| H  | 4.506798 | 8.887560  | 6.367499 |
| C  | 9.534726 | 12.923108 | 2.746191 |
| C  | 6.191063 | 11.704824 | 7.684622 |
| C  | 7.592468 | 8.622552  | 6.284925 |
| H  | 7.708682 | 8.209642  | 5.278469 |

|   |           |           |           |
|---|-----------|-----------|-----------|
| C | 2.012424  | 9.467869  | 4.118556  |
| H | 0.962035  | 9.213697  | 3.944547  |
| C | 8.189989  | 13.944396 | 6.864017  |
| H | 8.358193  | 12.928361 | 6.506212  |
| C | 6.820807  | 10.439684 | 7.576102  |
| C | 4.719610  | 10.107269 | 4.589594  |
| C | 7.048082  | 10.433941 | 10.026152 |
| H | 7.384816  | 9.931399  | 10.937748 |
| C | 8.371817  | 12.235586 | 3.185876  |
| C | 7.126843  | 12.321795 | 2.470875  |
| C | 4.026395  | 10.604210 | 3.454762  |
| C | 8.012392  | 7.927589  | 7.399860  |
| H | 8.467459  | 6.941253  | 7.277599  |
| C | 7.246035  | 9.781859  | 8.788598  |
| C | 7.854802  | 8.499980  | 8.674799  |
| H | 8.186018  | 7.979781  | 9.577022  |
| C | 6.650246  | 15.786088 | 7.274685  |
| C | 4.848323  | 11.480961 | 2.557668  |
| C | 2.672003  | 10.297775 | 3.199182  |
| C | 6.428549  | 11.685359 | 10.098855 |
| H | 6.275126  | 12.165976 | 11.069035 |
| C | 1.916637  | 10.813668 | 2.007168  |
| H | 0.882548  | 10.437077 | 2.011737  |
| H | 2.398997  | 10.517745 | 1.063781  |
| H | 1.894232  | 11.913445 | 1.990098  |
| C | 9.494453  | 11.292271 | 4.983834  |
| H | 9.439825  | 10.650303 | 5.866754  |
| C | 10.698171 | 11.924763 | 4.616016  |
| H | 11.594056 | 11.762052 | 5.218270  |
| C | 10.715913 | 12.744595 | 3.510078  |
| H | 11.632228 | 13.258450 | 3.206404  |
| C | 8.252630  | 13.815717 | 0.907721  |
| H | 8.186778  | 14.437280 | 0.009676  |
| C | 7.096520  | 13.124573 | 1.326892  |
| H | 6.165267  | 13.203622 | 0.769705  |
| C | 9.453483  | 13.730669 | 1.583638  |
| H | 10.340612 | 14.268235 | 1.240517  |
| C | 2.668213  | 8.967569  | 5.243698  |
| H | 2.123745  | 8.324204  | 5.943001  |
| C | 5.280186  | 16.398044 | 7.252920  |
| H | 4.950178  | 16.584305 | 6.220673  |
| H | 5.268826  | 17.347990 | 7.805861  |
| H | 4.529978  | 15.727056 | 7.699948  |
| C | 7.732876  | 16.514548 | 7.785036  |
| H | 7.554804  | 17.525872 | 8.162297  |
| C | 9.022467  | 15.985127 | 7.821295  |
| H | 9.845220  | 16.585401 | 8.219307  |
| C | 9.256209  | 14.692504 | 7.354292  |
| H | 10.261600 | 14.264027 | 7.374478  |
| H | 4.969500  | 11.859344 | 6.004539  |

**<sup>4</sup>D**

67

E: -3063.20723681

|    |          |           |          |
|----|----------|-----------|----------|
| Co | 5.892514 | 11.446948 | 3.907215 |
|----|----------|-----------|----------|

|   |           |           |           |
|---|-----------|-----------|-----------|
| O | 4.379000  | 14.701683 | 2.176673  |
| N | 4.660742  | 14.017454 | 4.306979  |
| N | 5.770858  | 11.933834 | 5.829402  |
| O | 4.866995  | 9.930739  | 0.367900  |
| N | 7.475710  | 12.539746 | 3.511265  |
| N | 5.968145  | 11.027833 | 2.080667  |
| C | 2.395295  | 14.200092 | 3.383780  |
| C | 3.883134  | 14.351051 | 3.240417  |
| C | 3.399780  | 14.761759 | 6.258203  |
| H | 2.981062  | 15.567881 | 5.652546  |
| C | 3.532249  | 9.902865  | 4.989902  |
| H | 3.752277  | 10.245220 | 6.006918  |
| C | 8.928253  | 13.170006 | 1.621523  |
| C | 4.299775  | 13.859746 | 5.659974  |
| C | 6.417281  | 11.023981 | 6.620514  |
| H | 7.131386  | 10.372348 | 6.108626  |
| C | 2.094044  | 8.662690  | 3.485356  |
| H | 1.208217  | 8.040291  | 3.322724  |
| C | 1.882049  | 12.962369 | 3.784290  |
| H | 2.573382  | 12.158599 | 4.050385  |
| C | 4.902588  | 12.819980 | 6.415962  |
| C | 4.362478  | 10.290896 | 3.925791  |
| C | 3.655845  | 13.639195 | 8.377730  |
| H | 3.413131  | 13.548260 | 9.440665  |
| C | 7.819165  | 12.463343 | 2.175076  |
| C | 6.999125  | 11.633233 | 1.364221  |
| C | 4.029484  | 9.811208  | 2.631935  |
| C | 6.186092  | 10.899165 | 7.973996  |
| H | 6.735857  | 10.145500 | 8.544033  |
| C | 4.591037  | 12.737128 | 7.823105  |
| C | 5.245916  | 11.737627 | 8.598241  |
| H | 5.025578  | 11.653890 | 9.665373  |
| C | 1.527728  | 15.253081 | 3.032726  |
| C | 4.980725  | 10.246356 | 1.554367  |
| C | 2.898168  | 9.005817  | 2.385425  |
| C | 3.064095  | 14.636938 | 7.600987  |
| H | 2.354718  | 15.336720 | 8.051564  |
| C | 2.515416  | 8.508760  | 1.019292  |
| H | 1.592200  | 7.911251  | 1.069088  |
| H | 3.312384  | 7.894844  | 0.574084  |
| H | 2.362575  | 9.340581  | 0.315797  |
| C | 8.245269  | 13.320878 | 4.328781  |
| H | 7.939739  | 13.347698 | 5.378268  |
| C | 9.333681  | 14.035866 | 3.869344  |
| H | 9.905225  | 14.643229 | 4.577408  |
| C | 9.703920  | 13.981948 | 2.508236  |
| H | 10.561490 | 14.542038 | 2.126783  |
| C | 8.373409  | 12.203719 | -0.552216 |
| H | 8.588988  | 12.103608 | -1.620935 |
| C | 7.287630  | 11.509434 | -0.010074 |
| H | 6.649443  | 10.875946 | -0.623259 |
| C | 9.184786  | 13.020326 | 0.237993  |
| H | 10.030463 | 13.556369 | -0.204148 |
| C | 2.409812  | 9.098184  | 4.772513  |
| H | 1.767598  | 8.809968  | 5.611837  |

|   |           |           |          |
|---|-----------|-----------|----------|
| C | 2.053530  | 16.593294 | 2.609942 |
| H | 2.745246  | 17.006798 | 3.362119 |
| H | 1.235094  | 17.312429 | 2.464261 |
| H | 2.626058  | 16.510127 | 1.674722 |
| C | 0.148954  | 15.020174 | 3.109560 |
| H | -0.538178 | 15.832380 | 2.854082 |
| C | -0.362472 | 13.782369 | 3.501303 |
| H | -1.444604 | 13.630962 | 3.545144 |
| C | 0.506838  | 12.745204 | 3.836188 |
| H | 0.120519  | 11.769168 | 4.141673 |
| H | 5.651507  | 13.924437 | 4.074909 |

**<sup>2</sup>D-TS**

75

E: -3292.26122545

|    |          |           |           |
|----|----------|-----------|-----------|
| Co | 5.161444 | 12.017307 | 3.236551  |
| O  | 2.759858 | 11.805757 | 0.184594  |
| N  | 3.078858 | 13.174176 | 1.947143  |
| N  | 4.577598 | 13.569405 | 4.308069  |
| O  | 5.151610 | 8.467658  | 1.384009  |
| N  | 6.738143 | 12.904948 | 2.482896  |
| N  | 5.660167 | 10.616978 | 2.070945  |
| C  | 2.843234 | 14.105203 | -0.340726 |
| C  | 2.894851 | 12.945447 | 0.615815  |
| C  | 1.968741 | 15.322866 | 2.303479  |
| H  | 1.354361 | 15.134820 | 1.423008  |
| C  | 2.845473 | 10.926090 | 4.824580  |
| H  | 2.768934 | 11.869815 | 5.376235  |
| C  | 8.475777 | 12.589607 | 0.799836  |
| C  | 2.915108 | 14.354761 | 2.698991  |
| C  | 5.204100 | 13.743843 | 5.510929  |
| H  | 5.860065 | 12.922517 | 5.809409  |
| C  | 2.034434 | 8.677214  | 4.432396  |
| H  | 1.336339 | 7.868863  | 4.672931  |
| C  | 1.741510 | 14.143364 | -1.204960 |
| H  | 0.976181 | 13.368370 | -1.113617 |
| C  | 3.678313 | 14.522595 | 3.891160  |
| C  | 3.831747 | 10.784628 | 3.829650  |
| C  | 2.548094 | 16.702124 | 4.194027  |
| H  | 2.416138 | 17.615166 | 4.782225  |
| C  | 7.334088 | 12.147615 | 1.518706  |
| C  | 6.736264 | 10.863733 | 1.269776  |
| C  | 3.875237 | 9.539021  | 3.140369  |
| C  | 5.041382 | 14.864145 | 6.298761  |
| H  | 5.585759 | 14.935176 | 7.244569  |
| C  | 3.461465 | 15.728905 | 4.661263  |
| C  | 4.183352 | 15.893344 | 5.874591  |
| H  | 4.038513 | 16.800742 | 6.466724  |
| C  | 3.868678 | 15.064500 | -0.460999 |
| C  | 4.945904 | 9.454396  | 2.097311  |
| C  | 2.990959 | 8.476429  | 3.425187  |
| C  | 1.804203 | 16.493818 | 3.032084  |
| H  | 1.074144 | 17.239026 | 2.703448  |
| C  | 3.025269 | 7.157334  | 2.704812  |
| H  | 2.245806 | 6.483171  | 3.092071  |

|   |          |           |           |
|---|----------|-----------|-----------|
| H | 4.004102 | 6.665800  | 2.807785  |
| H | 2.878845 | 7.285445  | 1.621938  |
| C | 7.256749 | 14.083080 | 2.786059  |
| H | 6.746797 | 14.652791 | 3.566111  |
| C | 8.394970 | 14.598890 | 2.136928  |
| H | 8.776419 | 15.580252 | 2.427220  |
| C | 8.999023 | 13.862846 | 1.141695  |
| H | 9.878408 | 14.242507 | 0.613761  |
| C | 8.440756 | 10.513773 | -0.435849 |
| H | 8.864806 | 9.860116  | -1.204656 |
| C | 7.313835 | 10.060072 | 0.279714  |
| H | 6.877118 | 9.083293  | 0.081128  |
| C | 9.024814 | 11.743563 | -0.198420 |
| H | 9.901476 | 12.075323 | -0.760439 |
| C | 1.961671 | 9.888308  | 5.124421  |
| H | 1.202573 | 10.017582 | 5.903903  |
| C | 5.097485 | 15.021718 | 0.393200  |
| H | 5.506368 | 14.003627 | 0.454193  |
| H | 4.877263 | 15.335061 | 1.426733  |
| H | 5.877886 | 15.686147 | -0.003263 |
| C | 3.721961 | 16.064448 | -1.432706 |
| H | 4.515199 | 16.810167 | -1.541458 |
| C | 2.604412 | 16.122910 | -2.262983 |
| H | 2.518872 | 16.920836 | -3.005757 |
| C | 1.607098 | 15.153340 | -2.152902 |
| H | 0.731752 | 15.179963 | -2.807186 |
| H | 3.196672 | 12.303778 | 2.492741  |
| H | 6.006478 | 11.348890 | 4.343152  |
| O | 6.806965 | 11.019300 | 5.459636  |
| C | 8.061486 | 11.249042 | 5.301241  |
| C | 8.761178 | 11.739357 | 6.565986  |
| H | 8.396841 | 11.206852 | 7.457145  |
| H | 9.852497 | 11.637627 | 6.482624  |
| H | 8.521573 | 12.807737 | 6.704169  |
| O | 8.700268 | 11.143701 | 4.257272  |

### **E<sub>1</sub>**

34

E: -840.712983862

|   |          |           |          |
|---|----------|-----------|----------|
| O | 7.326035 | 13.585401 | 8.137156 |
| N | 6.953339 | 11.549839 | 7.267333 |
| N | 7.361177 | 10.355769 | 4.933757 |
| C | 5.558119 | 12.356734 | 9.133269 |
| C | 6.691399 | 12.544770 | 8.171539 |
| C | 6.049130 | 9.451763  | 8.213657 |
| H | 5.911053 | 9.883510  | 9.204303 |
| C | 6.570080 | 10.217622 | 7.184192 |
| C | 7.581924 | 9.813099  | 3.758365 |
| H | 8.043569 | 10.450400 | 2.994862 |
| C | 4.275580 | 12.131943 | 8.621721 |
| H | 4.137581 | 12.036972 | 7.540926 |
| C | 6.798154 | 9.600960  | 5.905955 |
| C | 5.878349 | 7.493584  | 6.777057 |
| H | 5.604969 | 6.447778  | 6.617028 |
| C | 7.256978 | 8.472015  | 3.448546 |

|   |          |           |           |
|---|----------|-----------|-----------|
| H | 7.461639 | 8.080055  | 2.449929  |
| C | 6.444759 | 8.234346  | 5.709472  |
| C | 6.691998 | 7.686612  | 4.425270  |
| H | 6.432186 | 6.642063  | 4.231862  |
| C | 5.768581 | 12.481503 | 10.519855 |
| C | 5.698315 | 8.100789  | 7.998814  |
| H | 5.280843 | 7.533540  | 8.834698  |
| C | 7.137231 | 12.724147 | 11.084214 |
| H | 7.857382 | 11.970585 | 10.726548 |
| H | 7.123378 | 12.692068 | 12.182558 |
| H | 7.522715 | 13.703956 | 10.765409 |
| C | 4.657525 | 12.354486 | 11.362382 |
| H | 4.803461 | 12.432783 | 12.443629 |
| C | 3.377546 | 12.134291 | 10.853353 |
| H | 2.529702 | 12.044845 | 11.537917 |
| C | 3.181142 | 12.029328 | 9.476956  |
| H | 2.180843 | 11.861593 | 9.069834  |
| H | 7.544543 | 11.834916 | 6.484049  |

${}^2E_2$

34

E: -2222.98796136

|    |          |           |           |
|----|----------|-----------|-----------|
| Co | 5.432335 | 12.126940 | 3.881679  |
| O  | 5.724821 | 9.194787  | 1.130534  |
| N  | 6.795234 | 13.428612 | 3.261395  |
| N  | 6.016411 | 11.144691 | 2.334100  |
| C  | 3.245514 | 10.388303 | 5.084671  |
| H  | 3.079365 | 11.123876 | 5.879658  |
| C  | 8.432484 | 13.776100 | 1.483954  |
| C  | 2.658369 | 8.268165  | 4.075267  |
| H  | 2.048515 | 7.359070  | 4.071850  |
| C  | 4.227070 | 10.627672 | 4.107569  |
| C  | 7.421883 | 13.006470 | 2.120976  |
| C  | 7.002320 | 11.734022 | 1.593917  |
| C  | 4.390093 | 9.631619  | 3.102680  |
| C  | 5.439043 | 9.936636  | 2.072412  |
| C  | 3.620510 | 8.446685  | 3.069968  |
| C  | 3.780108 | 7.379853  | 2.022818  |
| H  | 3.076222 | 6.553226  | 2.204119  |
| H  | 4.803965 | 6.977902  | 2.007506  |
| H  | 3.609508 | 7.776665  | 1.011105  |
| C  | 7.137302 | 14.592418 | 3.790395  |
| H  | 6.610165 | 14.887626 | 4.700477  |
| C  | 8.126087 | 15.422100 | 3.225922  |
| H  | 8.364703 | 16.372346 | 3.707887  |
| C  | 8.771196 | 15.017587 | 2.079464  |
| H  | 9.543440 | 15.639757 | 1.618468  |
| C  | 8.633880 | 12.049365 | -0.190786 |
| H  | 9.101525 | 11.657941 | -1.099354 |
| C  | 7.631183 | 11.277213 | 0.430769  |
| H  | 7.328303 | 10.316197 | 0.019431  |
| C  | 9.039724 | 13.272297 | 0.305559  |
| H  | 9.817598 | 13.858950 | -0.188975 |
| C  | 2.469447 | 9.226824  | 5.070641  |
| H  | 1.709527 | 9.061323  | 5.841931  |

H 4.964905 12.924515 5.160715

**<sup>2</sup>E-TS**

68

E: -3063.68973990

|    |          |           |           |
|----|----------|-----------|-----------|
| Co | 5.298502 | 11.633995 | 3.364100  |
| O  | 2.902033 | 15.230395 | 2.057939  |
| N  | 3.223470 | 13.985654 | 3.912307  |
| N  | 5.011629 | 12.312806 | 5.271853  |
| O  | 6.130936 | 8.670741  | 0.771484  |
| N  | 6.557362 | 13.054066 | 2.803062  |
| N  | 6.094412 | 10.678406 | 1.912401  |
| C  | 2.332554 | 16.303642 | 4.074376  |
| C  | 2.836577 | 15.113866 | 3.281180  |
| C  | 1.779167 | 13.971599 | 5.880641  |
| H  | 0.998790 | 14.502660 | 5.335031  |
| C  | 3.429083 | 9.623973  | 4.640991  |
| H  | 3.136334 | 10.358801 | 5.398540  |
| C  | 8.195514 | 13.573814 | 1.075811  |
| C  | 2.952433 | 13.625933 | 5.202309  |
| C  | 5.964464 | 11.723454 | 5.979297  |
| H  | 6.829990 | 11.356190 | 5.416832  |
| C  | 3.194748 | 7.391697  | 3.729999  |
| H  | 2.734529 | 6.399278  | 3.768466  |
| C  | 1.068230 | 16.797059 | 3.729448  |
| H  | 0.504816 | 16.291714 | 2.940365  |
| C  | 3.921218 | 12.825250 | 5.917755  |
| C  | 4.366545 | 9.965177  | 3.652770  |
| C  | 2.555288 | 13.029650 | 7.970288  |
| H  | 2.433189 | 12.830134 | 9.037489  |
| C  | 7.263474 | 12.696508 | 1.691432  |
| C  | 7.018103 | 11.375253 | 1.181347  |
| C  | 4.701126 | 8.964172  | 2.702192  |
| C  | 5.893515 | 11.514808 | 7.367325  |
| H  | 6.715619 | 11.014034 | 7.881608  |
| C  | 3.733681 | 12.590768 | 7.319194  |
| C  | 4.759054 | 11.917880 | 8.027503  |
| H  | 4.632799 | 11.737161 | 9.098593  |
| C  | 3.096435 | 16.961843 | 5.058847  |
| C  | 5.710045 | 9.387692  | 1.681201  |
| C  | 4.125688 | 7.673141  | 2.720378  |
| C  | 1.586022 | 13.682846 | 7.241984  |
| H  | 0.656525 | 13.999272 | 7.723359  |
| C  | 4.463421 | 6.603162  | 1.720499  |
| H  | 5.538023 | 6.367676  | 1.727434  |
| H  | 4.243719 | 6.927350  | 0.692401  |
| H  | 3.896328 | 5.683781  | 1.931687  |
| C  | 6.749639 | 14.245250 | 3.339637  |
| H  | 6.162842 | 14.473518 | 4.231085  |
| C  | 7.651514 | 15.181495 | 2.796823  |
| H  | 7.766237 | 16.154429 | 3.279037  |
| C  | 8.368614 | 14.850528 | 1.669252  |
| H  | 9.075123 | 15.556719 | 1.224295  |
| C  | 8.650971 | 11.859865 | -0.561658 |
| H  | 9.188628 | 11.514973 | -1.450094 |

|   |           |           |           |
|---|-----------|-----------|-----------|
| C | 7.731827  | 10.979259 | 0.045813  |
| H | 7.563347  | 9.981660  | -0.354770 |
| C | 8.892948  | 13.129829 | -0.076308 |
| H | 9.610089  | 13.797552 | -0.559715 |
| C | 2.850237  | 8.354333  | 4.680454  |
| H | 2.120703  | 8.106713  | 5.459014  |
| C | 4.483966  | 16.518467 | 5.417539  |
| H | 5.100640  | 16.380279 | 4.517074  |
| H | 4.479384  | 15.558965 | 5.959102  |
| H | 4.979461  | 17.260931 | 6.059129  |
| C | 2.535307  | 18.078591 | 5.694554  |
| H | 3.123100  | 18.600487 | 6.455902  |
| C | 1.259996  | 18.541349 | 5.374935  |
| H | 0.849317  | 19.411374 | 5.894624  |
| C | 0.521344  | 17.899629 | 4.380901  |
| H | -0.474606 | 18.259951 | 4.109420  |
| H | 3.967084  | 12.313691 | 2.436692  |
| H | 3.723141  | 13.013870 | 3.078902  |
